# Supplementary material
Source: PubMed Central journal article supplement (PMC3346831)
Supplement: supp_125.7.1827_JCS101550FigS1-S3.pdf [file supp_125.7.1827_JCS101550FigS1-S3.pdf]

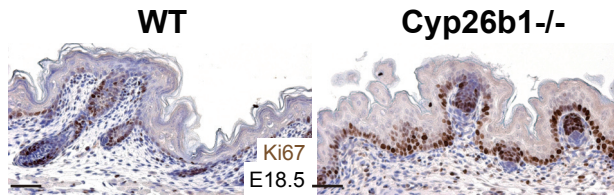

**Supplemental Figure S1. The absence of *Cyp26b1* affected proliferation in basal cell layer**

Immunohistochemistry using anti-Ki67 showed increased proliferative cells in E18.5 *Cyp26b1*<sup>-/-</sup> basal layer.

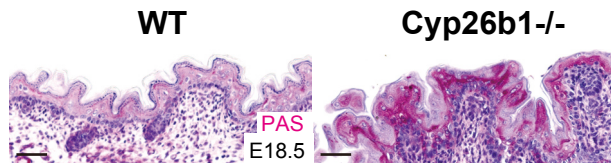

**Supplemental Figure S2. PAS staining is strongly positive in *Cyp26b1*<sup>-/-</sup> epidermis**

PAS (Periodic acid-Schiff) staining detected glycogen in *Cyp26b1*<sup>-/-</sup> suprabasal layers that was not observed in WT skin. Scale bars; 50 $\mu$ m.

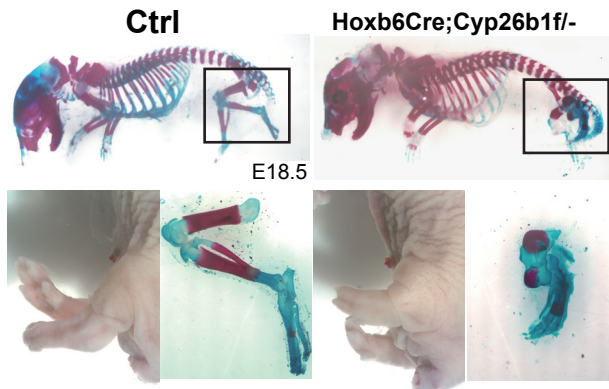

**Supplemental Figure S3. Skeletal phenotype of *Hoxb6Cre; Cyp26b1f*<sup>-/-</sup> mice**

Skeletal staining was performed using E18.5 *Hoxb6Cre; Cyp26b1f*<sup>-/-</sup> and control fetuses. Truncated hindlimb phenotype was observed in *Hoxb6Cre; Cyp26b1f*<sup>-/-</sup> mice. Boxed areas on the upper panels were magnified in the images on the bottom. Microscopic images were also shown on the bottom panel.
