# Supplementary material
Source: PubMed Central journal article supplement (PMC3346831)
Supplement: supp_125.7.1827_JCS101550TableS1.pdf [file supp_125.7.1827_JCS101550TableS1.pdf]

**Supplementary Table S1**

| Probeset ID  | Gene Title                                                                       | Gene Symbol   | p-value   | Fold-Change<br>(ko vs. wt) |
|--------------|----------------------------------------------------------------------------------|---------------|-----------|----------------------------|
| 1418173_at   | keratin 25                                                                       | Krt25         | 6.13E-08  | -44.5281                   |
| 1420409_at   | keratin 35                                                                       | Krt35         | 2.55E-06  | -30.2456                   |
| 1444061_at   | RIKEN cDNA A030004J04 gene                                                       | A030004J04Rik | 1.36E-06  | -24.8627                   |
| 1420465_s_at | major urinary protein 1 /// major urinary protein 2 /// RIKEN cDNA 2610016E04 ge | 2610016E04Rik | 1.84E-08  | -22.5823                   |
| 1448457_at   | keratin 71                                                                       | Krt71         | 3.33E-07  | -22.4953                   |
| 1430132_at   | keratin 28                                                                       | Krt28         | 2.33E-06  | -21.5227                   |
| 1419230_at   | keratin 12                                                                       | Krt12         | 2.09E-07  | -19.7547                   |
| 1436557_at   | keratin 73                                                                       | Krt73         | 2.99E-06  | -16.7313                   |
| 1418645_at   | histidine ammonia lyase                                                          | Hal           | 1.59E-05  | -16.2732                   |
| 1449378_at   | keratin 27                                                                       | Krt27         | 5.60E-07  | -15.1832                   |
| 1460185_at   | keratin 85 /// hypothetical protein LOC100044179                                 | Krt85         | 1.16E-06  | -14.879                    |
| 1421856_at   | S100 calcium binding protein A3                                                  | S100a3        | 5.53E-06  | -12.9833                   |
| 1419167_at   | proline-rich acidic protein 1                                                    | Prap1         | 1.16E-06  | -10.5433                   |
| 1419231_s_at | keratin 12                                                                       | Krt12         | 3.18E-06  | -9.95287                   |
| 1417732_at   | annexin A8                                                                       | Anxa8         | 1.46E-05  | -8.9681                    |
| 1419373_at   | ATPase, H+ transporting, lysosomal V1 subunit B1                                 | Atp6v1b1      | 1.48E-05  | -8.32806                   |
| 1425789_s_at | annexin A8                                                                       | Anxa8         | 2.35E-06  | -8.29758                   |
| 1434484_at   | RIKEN cDNA 1100001G20 gene                                                       | 1100001G20Rik | 3.82E-08  | -8.04908                   |
| 1458367_at   | gene model 94, (NCBI)                                                            | Gm94          | 6.13E-08  | -7.74899                   |
| 1450645_at   | metallothionein 4                                                                | Mt4           | 8.49E-06  | -7.57947                   |
| 1455996_x_at | proline-rich acidic protein 1                                                    | Prap1         | 1.88E-06  | -6.8                       |
| 1416646_at   | alpha fetoprotein                                                                | Afp           | 4.83E-05  | -6.44516                   |
| 1460011_at   | cytochrome P450, family 26, subfamily b, polypeptide 1                           | Cyp26b1       | 3.18E-05  | -6.26163                   |
| 1442389_at   | 2'-5' oligoadenylate synthetase 1F                                               | Oas1f         | 1.34E-05  | -6.11528                   |
| 1419767_at   | peptidyl arginine deiminase, type III                                            | Padi3         | 2.07E-07  | -6.11327                   |
| 1418847_at   | arginase type II                                                                 | Arg2          | 1.93E-06  | -5.95051                   |
| 1415969_s_at | kidney androgen regulated protein                                                | Kap           | 5.03E-06  | -5.76976                   |
| 1426154_s_at | major urinary protein 1 /// major urinary protein 2 /// major urinary protein 3  | 2610016E04Rik | 5.33E-05  | -5.55316                   |
| 1427378_at   | keratin 75                                                                       | Krt75         | 4.36E-06  | -5.48896                   |
| 1455277_at   | Hedgehog-interacting protein                                                     | Hhip          | 2.90E-05  | -5.16994                   |
| 1448881_at   | haptoglobin                                                                      | Hp            | 1.16E-05  | -5.15497                   |
| 1416645_a_at | alpha fetoprotein                                                                | Afp           | 0.0002912 | -5.10148                   |
| 1455201_x_at | apolipoprotein A-I                                                               | Apoa1         | 1.91E-05  | -5.01388                   |
| 1436160_at   | keratin 26                                                                       | Krt26         | 1.18E-05  | -4.99437                   |
| 1437933_at   | Hedgehog-interacting protein                                                     | Hhip          | 2.12E-05  | -4.96979                   |
| 1438840_x_at | apolipoprotein A-I                                                               | Apoa1         | 4.29E-05  | -4.86909                   |
| 1425874_at   | homeo box C13                                                                    | Hoxc13        | 1.93E-05  | -4.83684                   |
| 1434340_at   | RIKEN cDNA 1110020P15 gene                                                       | 1110020P15Rik | 1.02E-05  | -4.79584                   |
| 1424265_at   | N-acetylneuraminase pyruvate lyase                                               | Npl           | 8.19E-07  | -4.78704                   |
| 1421426_at   | Hedgehog-interacting protein                                                     | Hhip          | 0.0001036 | -4.55935                   |
| 1425645_s_at | cytochrome P450, family 2, subfamily b, polypeptide 10                           | Cyp2b10       | 3.91E-05  | -4.55762                   |

|              |                                                                                  |                         |           |          |
|--------------|----------------------------------------------------------------------------------|-------------------------|-----------|----------|
| 1427211_at   | keratin associated protein 8-1                                                   | Krtap8-1                | 4.47E-07  | -4.49758 |
| 1419232_a_at | apolipoprotein A-I                                                               | Apoa1                   | 2.24E-05  | -4.37991 |
| 1438567_at   | von Willebrand factor A domain containing 2                                      | Vwa2                    | 2.43E-05  | -4.37424 |
| 1448470_at   | fructose bisphosphatase 1                                                        | Fbp1                    | 4.66E-05  | -4.30117 |
| 1422939_at   | serine (or cysteine) peptidase inhibitor, clade B, member 3C /// serine (or cyst | Serp1nb3b /// Serpinb3c | 2.78E-07  | -4.23295 |
| 1421001_a_at | carbonic anhydrase 6                                                             | Car6                    | 9.54E-06  | -4.21231 |
| 1451696_at   | zinc finger protein 64                                                           | Zfp64                   | 0.0002556 | -4.17056 |
| 1418317_at   | LIM homeobox protein 2                                                           | Lhx2                    | 1.58E-05  | -4.11456 |
| 1451835_at   | SRY-box containing gene 21                                                       | Sox21                   | 6.40E-06  | -4.06581 |
| 1426268_at   | RIKEN cDNA C130090K23 gene                                                       | C130090K23Rik           | 3.17E-05  | -4.01925 |
| 1458659_at   | placenta specific 9 /// similar to Placenta specific 9                           | LOC100039175            | 4.85E-05  | -3.9975  |
| 1436055_at   | leucine rich repeat containing 15                                                | Lrrc15                  | 3.60E-07  | -3.97638 |
| 1431708_a_at | cytotoxic granule-associated RNA binding protein 1                               | Tia1                    | 1.57E-06  | -3.9316  |
| 1422940_x_at | serine (or cysteine) peptidase inhibitor, clade B, member 3C /// serine (or cyst | Serp1nb3b /// Serpinb3c | 8.12E-06  | -3.9266  |
| 1419618_at   | butyrobetaine (gamma), 2-oxoglutarate dioxygenase 1 (gamma-butyrobetaine hydroxy | Bbox1                   | 8.37E-06  | -3.89119 |
| 1425594_at   | laminin gamma 3                                                                  | Lamc3                   | 7.94E-05  | -3.88484 |
| 1440310_at   | Runt-related transcription factor 1; translocated to, 1 (cyclin D-related)       | Runx1t1                 | 7.38E-05  | -3.85389 |
| 1424542_at   | S100 calcium binding protein A4                                                  | S100a4                  | 9.22E-06  | -3.8533  |
| 1449387_at   | keratin 33A                                                                      | Krt33a                  | 1.27E-05  | -3.80168 |
| 1419233_x_at | apolipoprotein A-I                                                               | Apoa1                   | 1.72E-05  | -3.75543 |
| 1439543_at   | RIKEN cDNA 1110064A23 gene                                                       | 1110064A23Rik           | 2.14E-05  | -3.75012 |
| 1417639_at   | solute carrier family 22 (organic cation transporter), member 4                  | Slc22a4                 | 5.58E-05  | -3.71813 |
| 1439820_at   | Transcribed locus                                                                | ---                     | 1.37E-06  | -3.70244 |
| 1438841_s_at | arginase type II                                                                 | Arg2                    | 0.0005023 | -3.68156 |
| 1427355_at   | calcitonin/calcitonin-related polypeptide, alpha                                 | Calca                   | 6.28E-06  | -3.67139 |
| 1459348_at   | ---                                                                              | ---                     | 1.30E-05  | -3.62598 |
| 1448136_at   | ectonucleotide pyrophosphatase/phosphodiesterase 2                               | Enpp2                   | 4.45E-06  | -3.59    |
| 1422257_s_at | cytochrome P450, family 2, subfamily b, polypeptide 10                           | Cyp2b10                 | 0.0001393 | -3.58526 |
| 1453214_at   | leucine rich repeat containing 15                                                | Lrrc15                  | 4.84E-06  | -3.55429 |
| 1418149_at   | chromogranin A                                                                   | Chga                    | 3.83E-05  | -3.51567 |
| 1416832_at   | solute carrier family 39 (metal ion transporter), member 8                       | Slc39a8                 | 4.92E-05  | -3.51553 |
| 1452590_a_at | placenta specific 9 /// similar to Placenta specific 9                           | LOC100039175            | 7.91E-07  | -3.50892 |
| 1441627_at   | Transcribed locus                                                                | ---                     | 1.63E-06  | -3.48058 |
| 1446929_at   | predicted gene, ENSMUSG00000073981                                               | ENSMUSG00000073981      | 0.0001332 | -3.47625 |
| 1452416_at   | interleukin 6 receptor, alpha                                                    | Il6ra                   | 0.0005131 | -3.41523 |
| 1438849_at   | keratin 78                                                                       | Krt78                   | 1.15E-05  | -3.39537 |
| 1441977_at   | RIKEN cDNA 9630023C09 gene                                                       | 9630023C09Rik           | 1.15E-05  | -3.38278 |
| 1451596_a_at | sphingosine kinase 1                                                             | Sphk1                   | 0.0001432 | -3.37723 |
| 1419100_at   | serine (or cysteine) peptidase inhibitor, clade A, member 3N                     | Serpina3n               | 3.40E-05  | -3.37462 |
| 1416413_at   | cathepsin J                                                                      | Ctsj                    | 0.000134  | -3.3677  |
| 1420562_at   | secreted Ly6/Plaur domain containing 1                                           | Slurp1                  | 2.07E-05  | -3.36461 |
| 1435579_at   | Transcribed locus                                                                | ---                     | 1.53E-06  | -3.36277 |
| 1419188_s_at | chemokine (C-C motif) ligand 27 /// novel protein identical to chemokine (C-C mo | Ccl27                   | 4.97E-06  | -3.31124 |
| 1419017_at   | corin                                                                            | Corin                   | 1.13E-05  | -3.26788 |
| 1452270_s_at | cubilin (intrinsic factor-cobalamin receptor)                                    | Cubn                    | 0.0003536 | -3.2617  |

|              |                                                                                              |                         |           |          |
|--------------|----------------------------------------------------------------------------------------------|-------------------------|-----------|----------|
| 1436448_a_at | prostaglandin-endoperoxide synthase 1                                                        | Ptgs1                   | 2.20E-05  | -3.25409 |
| 1430379_at   | RIKEN cDNA 5830411K21 gene                                                                   | 5830411K21Rik           | 6.88E-05  | -3.18151 |
| 1439852_at   | ---                                                                                          | ---                     | 8.46E-05  | -3.17303 |
| 1449360_at   | colony stimulating factor 2 receptor, beta 2, low-affinity (granulocyte-macrophage)          | Csf2rb2                 | 2.21E-05  | -3.14497 |
| 1442067_at   | Transcribed locus                                                                            | ---                     | 3.93E-05  | -3.14145 |
| 1446669_at   | ---                                                                                          | ---                     | 3.18E-06  | -3.13692 |
| 1445025_at   | expressed sequence AU015536                                                                  | AU015536                | 0.0002539 | -3.11317 |
| 1449461_at   | retinol binding protein 7, cellular                                                          | Rbp7                    | 5.96E-05  | -3.10842 |
| 1416935_at   | transient receptor potential cation channel, subfamily V, member 2                           | Trpv2                   | 0.000678  | -3.08289 |
| 1425611_a_at | cut-like homeobox 1                                                                          | Cux1                    | 1.27E-05  | -3.07814 |
| 1442845_at   | RIKEN cDNA C130075A20 gene                                                                   | C130075A20Rik           | 7.12E-05  | -3.05509 |
| 1440372_at   | Transcribed locus                                                                            | ---                     | 6.29E-05  | -3.04595 |
| 1450317_at   | C-type lectin domain family 2, member g                                                      | Clec2g                  | 0.0007536 | -3.02498 |
| 1429693_at   | disabled homolog 2 (Drosophila)                                                              | Dab2                    | 5.73E-05  | -3.01725 |
| 1459289_at   | ---                                                                                          | ---                     | 0.0001081 | -3.00632 |
| 1438861_at   | basonuclin 2                                                                                 | Bnc2                    | 2.64E-07  | -3.00485 |
| 1438245_at   | ---                                                                                          | ---                     | 2.74E-06  | -3.00231 |
| 1456010_x_at | hairy and enhancer of split 5 (Drosophila)                                                   | Hes5                    | 0.0002763 | -2.95998 |
| 1458830_at   | Transcribed locus                                                                            | ---                     | 1.04E-05  | -2.95325 |
| 1460056_at   | RIKEN cDNA 1700109F18 gene                                                                   | 1700109F18Rik           | 0.0001132 | -2.94906 |
| 1450988_at   | leucine rich repeat containing G protein coupled receptor 5                                  | Lgr5                    | 3.60E-06  | -2.93654 |
| 1441172_at   | ---                                                                                          | ---                     | 4.69E-05  | -2.90819 |
| 1441375_at   | ---                                                                                          | ---                     | 0.0001264 | -2.90448 |
| 1440593_at   | ---                                                                                          | ---                     | 7.38E-05  | -2.89928 |
| 1448962_at   | myosin, heavy polypeptide 11, smooth muscle                                                  | Myh11                   | 0.0009895 | -2.89252 |
| 1417155_at   | v-myc myelocytomatosis viral related oncogene, neuroblastoma derived (avian)                 | Mycn                    | 3.75E-05  | -2.89229 |
| 1440304_at   | Transcribed locus, moderately similar to XP_001479965.1 PREDICTED: hypothetical              | ---                     | 1.67E-05  | -2.89063 |
| 1440465_at   | Transcribed locus                                                                            | ---                     | 0.0002241 | -2.88377 |
| 1423135_at   | thymus cell antigen 1, theta                                                                 | Thy1                    | 4.65E-07  | -2.82285 |
| 1439928_at   | Transcribed locus                                                                            | ---                     | 6.15E-05  | -2.81581 |
| 1437667_a_at | BTB and CNC homology 2                                                                       | Bach2                   | 1.57E-05  | -2.8157  |
| 1451715_at   | v-maf musculoaponeurotic fibrosarcoma oncogene family, protein B (avian)                     | Mafb                    | 1.78E-05  | -2.81302 |
| 1421598_at   | ---                                                                                          | ---                     | 0.0001704 | -2.81221 |
| 1453523_at   | keratin associated protein 17-1                                                              | Krtap17-1               | 0.000586  | -2.81138 |
| 1440339_at   | ectonucleotide pyrophosphatase/phosphodiesterase 1 /// RIKEN cDNA 4833416E15 gene            | 4833416E15Rik /// Enpp1 | 0.0002975 | -2.80591 |
| 1456778_at   | Transcribed locus                                                                            | ---                     | 3.10E-06  | -2.80524 |
| 1449455_at   | hemopoietic cell kinase                                                                      | Hck                     | 9.31E-06  | -2.79501 |
| 1449565_at   | cytochrome P450, family 2, subfamily g, polypeptide 1                                        | Cyp2g1                  | 5.09E-05  | -2.79327 |
| 1442576_at   | cAMP responsive element binding protein 5                                                    | Creb5                   | 9.37E-05  | -2.79119 |
| 1448793_a_at | syndecan 4                                                                                   | Sdc4                    | 9.96E-08  | -2.79064 |
| 1437574_at   | a disintegrin-like and metalloproteinase (reprolysin type) with thrombospondin type 1 motifs | Adamts18                | 2.56E-06  | -2.78936 |
| 1441165_s_at | calyculin 2                                                                                  | Clstn2                  | 3.69E-05  | -2.78737 |
| 1445518_at   | Transcribed locus                                                                            | ---                     | 0.0004729 | -2.77958 |
| 1417419_at   | cyclin D1                                                                                    | Ccnd1                   | 1.02E-07  | -2.77629 |
| 1440586_at   | RIKEN cDNA B430203I24 gene                                                                   | B430203I24Rik           | 8.98E-05  | -2.77486 |

|              |                                                                                  |               |           |          |
|--------------|----------------------------------------------------------------------------------|---------------|-----------|----------|
| 1437431_at   | Cut-like homeobox 1                                                              | Cux1          | 8.85E-05  | -2.76801 |
| 1431118_at   | RIKEN cDNA 6720427H10 gene                                                       | 6720427H10Rik | 0.0001399 | -2.76136 |
| 1451716_at   | v-maf musculoaponeurotic fibrosarcoma oncogene family, protein B (avian)         | Mafb          | 2.82E-05  | -2.75899 |
| 1423281_at   | stathmin-like 2                                                                  | Stmn2         | 4.40E-06  | -2.75861 |
| 1451758_at   | laminin gamma 3                                                                  | Lamc3         | 5.09E-05  | -2.75831 |
| 1446484_at   | ---                                                                              | ---           | 0.0001254 | -2.75323 |
| 1420796_at   | aryl-hydrocarbon receptor repressor                                              | Ahrr          | 0.0002129 | -2.74906 |
| 1455965_at   | a disintegrin-like and metallopeptidase (reprolysin type) with thrombospondin ty | Adamts4       | 2.34E-05  | -2.742   |
| 1439798_at   | homeo box C10                                                                    | Hoxc10        | 1.92E-05  | -2.7384  |
| 1457324_at   | Transcribed locus                                                                | ---           | 0.0002287 | -2.7384  |
| 1460318_at   | cysteine and glycine-rich protein 3                                              | Csrp3         | 7.20E-07  | -2.72399 |
| 1459256_at   | Transcribed locus                                                                | ---           | 0.0001061 | -2.71338 |
| 1441956_s_at | Cut-like homeobox 1                                                              | Cux1          | 0.0005849 | -2.71151 |
| 1459030_at   | butyrobetaine (gamma), 2-oxoglutarate dioxygenase 1 (gamma-butyrobetaine hydroxy | Bbox1         | 5.85E-06  | -2.70939 |
| 1454200_at   | zinc finger E-box binding homeobox 2                                             | Zeb2          | 8.89E-05  | -2.70937 |
| 1437540_at   | muclipin 3                                                                       | Mcoln3        | 0.0002342 | -2.70181 |
| 1438714_at   | Transcribed locus                                                                | ---           | 5.54E-06  | -2.6949  |
| 1416612_at   | cytochrome P450, family 1, subfamily b, polypeptide 1                            | Cyp1b1        | 6.90E-06  | -2.69188 |
| 1442992_at   | hypothetical LOC403343                                                           | 130004C03     | 5.90E-05  | -2.69034 |
| 1418344_at   | transmembrane protein 8 (five membrane-spanning domains)                         | Tmem8         | 7.88E-05  | -2.68979 |
| 1458941_at   | zinc finger E-box binding homeobox 2                                             | Zeb2          | 1.23E-05  | -2.68767 |
| 1438214_at   | trichorhinophalangeal syndrome I (human)                                         | Trps1         | 4.26E-06  | -2.68502 |
| 1433043_at   | versican                                                                         | Vcan          | 0.000133  | -2.68364 |
| 1430448_at   | RIKEN cDNA 6720418B01 gene                                                       | 6720418B01Rik | 7.33E-05  | -2.68099 |
| 1453924_a_at | prostaglandin F receptor                                                         | Ptgr          | 9.28E-05  | -2.67087 |
| 1447071_at   | ---                                                                              | ---           | 0.000247  | -2.66865 |
| 1426990_at   | cubilin (intrinsic factor-cobalamin receptor)                                    | Cubn          | 8.18E-05  | -2.66545 |
| 1458605_at   | ---                                                                              | ---           | 8.15E-05  | -2.65243 |
| 1442393_at   | ---                                                                              | ---           | 0.0003059 | -2.65017 |
| 1424596_s_at | LIM and cysteine-rich domains 1                                                  | Lmcd1         | 3.72E-05  | -2.64348 |
| 1441507_at   | spectrin beta 2                                                                  | Spnb2         | 3.22E-05  | -2.63543 |
| 1436515_at   | BTB and CNC homology 2                                                           | Bach2         | 2.34E-07  | -2.63408 |
| 1447831_s_at | myotubularin related protein 7                                                   | Mtmr7         | 1.41E-05  | -2.63392 |
| 1455660_at   | colony stimulating factor 2 receptor, beta, low-affinity (granulocyte-macrophage | Csf2rb        | 0.0001404 | -2.6327  |
| 1418778_at   | coiled-coil domain containing 109B                                               | Ccdc109b      | 2.77E-05  | -2.62796 |
| 1439946_at   | ---                                                                              | ---           | 4.48E-06  | -2.62693 |
| 1455257_at   | integrin beta 3                                                                  | Itgb3         | 4.45E-05  | -2.62495 |
| 1430635_at   | melan-A                                                                          | Mlana         | 0.0002513 | -2.62394 |
| 1418090_at   | plasmalemma vesicle associated protein                                           | Plvap         | 2.73E-06  | -2.6216  |
| 1424155_at   | fatty acid binding protein 4, adipocyte                                          | Fabp4         | 0.0003002 | -2.61475 |
| 1448698_at   | cyclin D1                                                                        | Ccnd1         | 9.73E-08  | -2.60968 |
| 1441679_at   | ---                                                                              | ---           | 0.0003765 | -2.60702 |
| 1439686_at   | Transcribed locus                                                                | ---           | 0.0004083 | -2.60555 |
| 1441539_at   | ---                                                                              | ---           | 0.0001764 | -2.60544 |
| 1425644_at   | leptin receptor                                                                  | Lepr          | 3.09E-05  | -2.6033  |

|              |                                                                                  |                    |           |          |
|--------------|----------------------------------------------------------------------------------|--------------------|-----------|----------|
| 1439546_at   | RIKEN cDNA 4933417O08 gene                                                       | 4933417O08Rik      | 2.88E-06  | -2.59874 |
| 1446380_at   | RIKEN cDNA 9430076C15 gene                                                       | 9430076C15Rik      | 4.64E-05  | -2.59298 |
| 1438301_at   | Transcribed locus                                                                | ---                | 3.51E-05  | -2.59138 |
| 1426155_a_at | odd-skipped related 2 (Drosophila)                                               | Osr2               | 9.29E-05  | -2.58619 |
| 1448932_at   | keratin 16                                                                       | Krt16              | 0.0003223 | -2.58518 |
| 1416776_at   | crystallin, mu                                                                   | Crym               | 0.000527  | -2.5738  |
| 1440026_at   | ---                                                                              | ---                | 0.0002235 | -2.57212 |
| 1426528_at   | neuropilin 2                                                                     | Nrp2               | 4.73E-06  | -2.56575 |
| 1423285_at   | coagulation factor C homolog (Limulus polyphemus)                                | Coch               | 0.000201  | -2.5629  |
| 1434819_at   | beta galactoside alpha 2,6 sialyltransferase 2                                   | St6gal2            | 0.0008101 | -2.56093 |
| 1436869_at   | sonic hedgehog                                                                   | Shh                | 5.96E-06  | -2.55793 |
| 1455377_at   | tubulin tyrosine ligase-like family, member 7                                    | Ttl7               | 0.0010255 | -2.55657 |
| 1423414_at   | prostaglandin-endoperoxide synthase 1                                            | Ptgs1              | 3.68E-05  | -2.55569 |
| 1426852_x_at | nephroblastoma overexpressed gene                                                | Nov                | 0.0001036 | -2.55323 |
| 1442504_at   | Transcribed locus                                                                | ---                | 0.0001165 | -2.55162 |
| 1448710_at   | chemokine (C-X-C motif) receptor 4                                               | Cxcr4              | 0.0002499 | -2.5507  |
| 1439100_s_at | keratin associated protein 11-1                                                  | Krtap11-1          | 0.0001792 | -2.54916 |
| 1430320_at   | dystrophin, muscular dystrophy                                                   | Dmd                | 0.0004353 | -2.54739 |
| 1425505_at   | myosin, light polypeptide kinase                                                 | Mylk               | 6.25E-07  | -2.53622 |
| 1458551_at   | predicted gene, ENSMUSG00000069163                                               | ENSMUSG00000069163 | 0.0006777 | -2.53338 |
| 1444253_at   | a disintegrin-like and metallopeptidase (reprolysin type) with thrombospondin ty | Adamts18           | 9.98E-05  | -2.53298 |
| 1457445_at   | trichorhinophalangeal syndrome I (human)                                         | Trps1              | 3.93E-06  | -2.53176 |
| 1456983_at   | Transcribed locus                                                                | ---                | 5.58E-05  | -2.52131 |
| 1446247_at   | a disintegrin-like and metallopeptidase (reprolysin type) with thrombospondin ty | Adamts18           | 0.000852  | -2.52062 |
| 1441372_at   | RIKEN cDNA 5930405F01 gene                                                       | 5930405F01Rik      | 0.0001551 | -2.52061 |
| 1439449_at   | special AT-rich sequence binding protein 1                                       | Satb1              | 0.0008092 | -2.51733 |
| 1457047_at   | Transcribed locus                                                                | ---                | 0.0008343 | -2.51524 |
| 1440660_at   | ---                                                                              | ---                | 0.0003288 | -2.51261 |
| 1439663_at   | Patched homolog 1                                                                | Ptch1              | 0.0002001 | -2.50074 |
| 1433583_at   | zinc finger protein 365                                                          | Zfp365             | 0.0003211 | -2.49804 |
| 1436864_at   | ---                                                                              | ---                | 0.0010065 | -2.49784 |
| 1435349_at   | neuropilin 2                                                                     | Nrp2               | 9.53E-08  | -2.49597 |
| 1459847_x_at | glial cell line derived neurotrophic factor family receptor alpha 2              | Gfra2              | 0.0002098 | -2.49464 |
| 1460666_a_at | early B-cell factor 3                                                            | Ebf3               | 0.0009793 | -2.49363 |
| 1460587_at   | RIKEN cDNA B230215L15 gene                                                       | B230215L15Rik      | 9.19E-05  | -2.48848 |
| 1458057_at   | ---                                                                              | ---                | 2.51E-06  | -2.48537 |
| 1448502_at   | solute carrier family 16 (monocarboxylic acid transporters), member 7            | Slc16a7            | 0.000441  | -2.48229 |
| 1419276_at   | ectonucleotide pyrophosphatase/phosphodiesterase 1                               | Enpp1              | 0.0001661 | -2.47804 |
| 1420349_at   | prostaglandin F receptor                                                         | Ptgr               | 4.32E-05  | -2.47757 |
| 1416752_at   | LIM domain binding 3                                                             | Ldb3               | 0.0001124 | -2.47243 |
| 1436755_at   | inter-alpha (globulin) inhibitor H5                                              | Itih5              | 2.52E-05  | -2.46585 |
| 1421564_at   | serine (or cysteine) peptidase inhibitor, clade A, member 3C                     | Serpina3c          | 0.0001048 | -2.46436 |
| 1427520_a_at | myosin, heavy polypeptide 1, skeletal muscle, adult                              | Myh1               | 0.0018931 | -2.45813 |
| 1446481_at   | ---                                                                              | ---                | 0.0001515 | -2.45366 |
| 1425312_s_at | cleavage and polyadenylation specific factor 4-like                              | Cpsf4l             | 3.65E-05  | -2.44778 |

|              |                                                                                  |                         |           |          |
|--------------|----------------------------------------------------------------------------------|-------------------------|-----------|----------|
| 1427597_at   | pleckstrin homology domain containing, family H (with MyTH4 domain) member 2     | Plekhh2                 | 1.41E-05  | -2.44637 |
| 1443263_at   | ---                                                                              | ---                     | 0.0001494 | -2.43945 |
| 1459183_at   | ---                                                                              | ---                     | 0.0003166 | -2.43488 |
| 1421589_at   | keratin 31                                                                       | Krt31                   | 0.000156  | -2.43159 |
| 1423396_at   | angiotensinogen (serpin peptidase inhibitor, clade A, member 8)                  | Agt                     | 1.50E-05  | -2.42965 |
| 1421028_a_at | myocyte enhancer factor 2C                                                       | Mef2c                   | 2.13E-05  | -2.41785 |
| 1458050_at   | ---                                                                              | ---                     | 1.78E-05  | -2.41476 |
| 1450179_at   | sclerostin                                                                       | Sost                    | 0.0007265 | -2.41441 |
| 1417101_at   | heat shock protein 2                                                             | Hspa2                   | 0.0002009 | -2.41364 |
| 1438083_at   | Hedgehog-interacting protein                                                     | Hhip                    | 0.0002712 | -2.41112 |
| 1436398_at   | Transcribed locus                                                                | ---                     | 0.0001646 | -2.40757 |
| 1439650_at   | reticulon 4                                                                      | Rtn4                    | 4.87E-05  | -2.40541 |
| 1435551_at   | formin homology 2 domain containing 3                                            | Fhod3                   | 4.58E-05  | -2.40478 |
| 1450482_a_at | paired-like homeodomain transcription factor 2                                   | Pitx2                   | 0.000151  | -2.40301 |
| 1427510_at   | guanine nucleotide binding protein (G protein), alpha inhibiting 1               | Gnai1                   | 3.15E-05  | -2.40177 |
| 1448575_at   | interleukin 7 receptor                                                           | Il7r                    | 6.64E-05  | -2.4015  |
| 1449530_at   | trichorhinophalangeal syndrome I (human) /// similar to Trps1 protein            | LOC100044341 /// Trps1  | 0.0001979 | -2.40095 |
| 1426951_at   | cysteine rich transmembrane BMP regulator 1 (chordin like)                       | Crim1                   | 7.22E-05  | -2.39923 |
| 1455535_at   | SRY-box containing gene 5 /// RIKEN cDNA A730017D01 gene                         | A730017D01Rik /// Sox5  | 0.0010609 | -2.39691 |
| 1425002_at   | secreted and transmembrane 1A                                                    | Sectm1a                 | 0.0007155 | -2.3956  |
| 1431694_a_at | catenin beta interacting protein 1                                               | Ctnnbip1                | 1.29E-05  | -2.39425 |
| 1443847_x_at | AF4/FMR2 family, member 2                                                        | Aff2                    | 7.78E-05  | -2.39105 |
| 1420747_at   | per-pentamer repeat gene                                                         | Ppnr                    | 6.46E-05  | -2.38748 |
| 1436504_x_at | apolipoprotein A-IV                                                              | Apoa4                   | 1.35E-06  | -2.38705 |
| 1448785_at   | runt-related transcription factor 1; translocated to, 1 (cyclin D-related)       | Runx1t1                 | 0.0001314 | -2.38681 |
| 1447204_at   | ---                                                                              | ---                     | 2.74E-06  | -2.37826 |
| 1458739_at   | ---                                                                              | ---                     | 0.0005548 | -2.37678 |
| 1458823_at   | ---                                                                              | ---                     | 2.47E-05  | -2.37524 |
| 1419691_at   | cathelicidin antimicrobial peptide                                               | Camp                    | 0.0003837 | -2.37282 |
| 1441333_at   | ---                                                                              | ---                     | 1.84E-05  | -2.36892 |
| 1436520_at   | AHNAK nucleoprotein 2                                                            | Ahnak2                  | 0.000489  | -2.36778 |
| 1433716_x_at | glial cell line derived neurotrophic factor family receptor alpha 2              | Gfra2                   | 0.0037134 | -2.36579 |
| 1441509_at   | RIKEN cDNA A130009I22 gene                                                       | A130009I22Rik           | 9.30E-06  | -2.36515 |
| 1444045_at   | Transcribed locus                                                                | ---                     | 0.0001307 | -2.35217 |
| 1422303_a_at | tumor necrosis factor receptor superfamily, member 18                            | Tnfrsf18                | 5.69E-05  | -2.34712 |
| 1439586_at   | hypothetical LOC548102                                                           | LOC548102               | 0.0025684 | -2.34171 |
| 1459695_at   | ---                                                                              | ---                     | 6.25E-05  | -2.3413  |
| 1439819_at   | expressed sequence AU015263                                                      | AU015263                | 0.0009588 | -2.33982 |
| 1418606_at   | homeo box D10                                                                    | Hoxd10                  | 0.0002503 | -2.33755 |
| 1417676_a_at | protein tyrosine phosphatase, receptor type, O                                   | Ptpro                   | 0.0001093 | -2.33676 |
| 1441584_at   | ---                                                                              | ---                     | 8.83E-05  | -2.33155 |
| 1422592_at   | catenin (cadherin associated protein), delta 2 /// similar to arm-repeat protein | Ctnnd2 /// LOC100045979 | 0.0003977 | -2.33058 |
| 1458220_at   | deleted in liver cancer 1                                                        | Dlc1                    | 0.0003276 | -2.33033 |
| 1451857_a_at | notum pectinacylesterase homolog (Drosophila)                                    | Notum                   | 0.0002068 | -2.3301  |
| 1435044_at   | early B-cell factor 4                                                            | Ebf4                    | 0.0001112 | -2.32481 |

|              |                                                                                  |                    |           |          |
|--------------|----------------------------------------------------------------------------------|--------------------|-----------|----------|
| 1429018_at   | RIKEN cDNA 3830408D24 gene                                                       | 3830408D24Rik      | 6.74E-05  | -2.3245  |
| 1447343_at   | neuropilin 2                                                                     | Nrp2               | 0.0012492 | -2.32097 |
| 1449996_a_at | tropomyosin 3, gamma                                                             | Tpm3               | 0.0004246 | -2.32049 |
| 1439191_at   | Transcribed locus                                                                | ---                | 4.47E-05  | -2.31516 |
| 1449064_at   | L-threonine dehydrogenase                                                        | Tdh                | 9.88E-06  | -2.31299 |
| 1426225_at   | retinol binding protein 4, plasma                                                | Rbp4               | 1.51E-05  | -2.31018 |
| 1444628_at   | a disintegrin and metallopeptidase domain 33                                     | Adam33             | 0.002951  | -2.30902 |
| 1443471_at   | zinc finger and BTB domain containing 20                                         | Zbtb20             | 0.0002277 | -2.3023  |
| 1424890_at   | basonuclin 1                                                                     | Bnc1               | 2.08E-05  | -2.30156 |
| 1459595_at   | Transcribed locus                                                                | ---                | 0.0008011 | -2.3002  |
| 1453586_at   | ectonucleoside triphosphate diphosphohydrolase 1                                 | Entpd1             | 0.0002772 | -2.30014 |
| 1423326_at   | ectonucleoside triphosphate diphosphohydrolase 1                                 | Entpd1             | 0.0006069 | -2.2983  |
| 1453646_at   | RIKEN cDNA 3110005L21 gene                                                       | 3110005L21Rik      | 0.0001259 | -2.2954  |
| 1436879_x_at | alpha fetoprotein                                                                | Afp                | 0.0008109 | -2.29344 |
| 1445984_at   | Transcribed locus                                                                | ---                | 0.0010767 | -2.29322 |
| 1435290_x_at | histocompatibility 2, class II antigen A, alpha                                  | H2-Aa              | 5.52E-05  | -2.29282 |
| 1448553_at   | myosin, heavy polypeptide 7, cardiac muscle, beta /// similar to myosin, heavy p | LOC674761 /// Myh7 | 6.87E-06  | -2.29024 |
| 1441230_at   | ---                                                                              | ---                | 1.73E-05  | -2.28197 |
| 1452001_at   | nuclear factor, erythroid derived 2                                              | Nfe2               | 0.0008928 | -2.28117 |
| 1427320_at   | coatomer protein complex, subunit gamma 2, antisense 2                           | Copg2as2           | 2.92E-07  | -2.28028 |
| 1435455_at   | expressed sequence C79267                                                        | C79267             | 8.52E-05  | -2.27733 |
| 1434425_at   | trichohyalin                                                                     | Tchh               | 0.0005049 | -2.27369 |
| 1418492_at   | gremlin 2 homolog, cysteine knot superfamily ( <i>Xenopus laevis</i> )           | Grem2              | 6.75E-06  | -2.2728  |
| 1437318_at   | p21 (CDKN1A)-activated kinase 3                                                  | Pak3               | 2.70E-05  | -2.27239 |
| 1443289_at   | Transcribed locus                                                                | ---                | 3.70E-05  | -2.27114 |
| 1442033_at   | C1q and tumor necrosis factor related protein 9                                  | C1qtnf9            | 3.94E-05  | -2.27083 |
| 1441384_at   | Transcribed locus                                                                | ---                | 0.0001228 | -2.27039 |
| 1437473_at   | avian musculoaponeurotic fibrosarcoma (v-maf) AS42 oncogene homolog              | Maf                | 0.0001527 | -2.26451 |
| 1444646_at   | RIKEN cDNA 8430420F16 gene                                                       | 8430420F16Rik      | 0.000192  | -2.26448 |
| 1438244_at   | nuclear factor I/B                                                               | Nfib               | 0.0001104 | -2.26401 |
| 1443906_at   | CD55 antigen                                                                     | Cd55               | 0.0001342 | -2.26363 |
| 1440563_at   | Transcribed locus                                                                | ---                | 7.20E-05  | -2.26355 |
| 1452946_a_at | rafflin family member 2                                                          | Rftn2              | 7.15E-05  | -2.26213 |
| 1434683_at   | Transcribed locus                                                                | ---                | 2.02E-05  | -2.26108 |
| 1442916_at   | Transcribed locus                                                                | ---                | 0.0020885 | -2.26086 |
| 1455435_s_at | choline dehydrogenase                                                            | Chdh               | 9.43E-05  | -2.25816 |
| 1448877_at   | distal-less homeobox 2                                                           | Dlx2               | 0.0006655 | -2.2575  |
| 1442680_at   | Transcribed locus                                                                | ---                | 0.0009953 | -2.25734 |
| 1447933_at   | kinesin family member 26A                                                        | Kif26a             | 6.66E-05  | -2.25717 |
| 1452391_at   | coxsackievirus and adenovirus receptor                                           | Cxadr              | 0.0002965 | -2.25625 |
| 1427263_at   | inactive X specific transcripts                                                  | Xist               | 0.0001599 | -2.2514  |
| 1445831_at   | ---                                                                              | ---                | 2.56E-05  | -2.24967 |
| 1436936_s_at | inactive X specific transcripts                                                  | Xist               | 0.0004665 | -2.24466 |
| 1432022_at   | Cdc42 GTPase-activating protein                                                  | Cdgap              | 0.0002045 | -2.24307 |
| 1423280_at   | stathmin-like 2                                                                  | Stmn2              | 6.95E-06  | -2.243   |

|              |                                                                                  |                              |           |          |
|--------------|----------------------------------------------------------------------------------|------------------------------|-----------|----------|
| 1443086_at   | activated leukocyte cell adhesion molecule                                       | Alcam                        | 0.000101  | -2.24132 |
| 1446324_at   | Transcribed locus                                                                | ---                          | 9.44E-06  | -2.23977 |
| 1442605_at   | Transcribed locus, moderately similar to XP_001479965.1 PREDICTED: hypothetical  | ---                          | 0.0001442 | -2.23951 |
| 1427035_at   | solute carrier family 39 (zinc transporter), member 14                           | Slc39a14                     | 2.85E-05  | -2.23901 |
| 1438702_at   | fibronectin leucine rich transmembrane protein 2                                 | Flrt2                        | 3.75E-06  | -2.23716 |
| 1433086_at   | RIKEN cDNA 5930427J20 gene                                                       | 5930427J20Rik                | 2.16E-05  | -2.23376 |
| 1439353_x_at | transmembrane protein 56                                                         | Tmem56                       | 0.0130276 | -2.23314 |
| 1424187_at   | coiled-coil domain containing 80                                                 | Ccdc80                       | 1.00E-05  | -2.23246 |
| 1421596_s_at | histocompatibility 28                                                            | H28                          | 0.0005797 | -2.23075 |
| 1417420_at   | cyclin D1                                                                        | Ccnd1                        | 0.000316  | -2.23011 |
| 1456156_at   | leptin receptor                                                                  | Lepr                         | 0.0021888 | -2.22751 |
| 1447928_at   | carbonic anhydrase 5b, mitochondrial                                             | Car5b                        | 4.38E-05  | -2.22591 |
| 1445855_at   | RIKEN cDNA A030007L17 gene                                                       | A030007L17Rik                | 0.0009442 | -2.22451 |
| 1421326_at   | colony stimulating factor 2 receptor, beta, low-affinity (granulocyte-macrophage | Csf2rb                       | 0.0009736 | -2.22344 |
| 1425779_a_at | T-box 1                                                                          | Tbx1                         | 0.0003436 | -2.222   |
| 1427365_at   | keratin 86                                                                       | Krt86                        | 0.0001862 | -2.2191  |
| 1423381_at   | RIKEN cDNA 4921521F21 gene                                                       | 4921521F21Rik                | 0.0004312 | -2.21648 |
| 1432686_at   | RIKEN cDNA 4833406M21 gene                                                       | 4833406M21Rik                | 0.0005725 | -2.21544 |
| 1440635_at   | palladin, cytoskeletal associated protein                                        | Palld                        | 0.0003634 | -2.21433 |
| 1427025_at   | myotubularin related protein 7                                                   | Mtmr7                        | 2.69E-05  | -2.21358 |
| 1452431_s_at | histocompatibility 2, class II antigen A, alpha                                  | H2-Aa                        | 0.0003903 | -2.21132 |
| 1439839_at   | RIKEN cDNA D130051D11 gene                                                       | D130051D11Rik                | 9.87E-06  | -2.2104  |
| 1442194_at   | expressed sequence AU018552                                                      | AU018552                     | 1.94E-05  | -2.20889 |
| 1434110_x_at | major urinary protein 1 /// major urinary protein 2 /// RIKEN cDNA 2610016E04 ge | 2610016E04Rik /// Mup1 /// M | 0.0002039 | -2.20832 |
| 1425226_x_at | similar to T-cell receptor beta-2 chain C region                                 | LOC665506                    | 1.66E-05  | -2.20533 |
| 1422748_at   | zinc finger E-box binding homeobox 2                                             | Zeb2                         | 1.97E-05  | -2.20415 |
| 1443240_at   | ---                                                                              | ---                          | 0.000169  | -2.2025  |
| 1441991_at   | cDNA sequence BC039632                                                           | BC039632                     | 0.0004184 | -2.20236 |
| 1435267_at   | RIKEN cDNA A430108E01 gene                                                       | A430108E01Rik                | 4.74E-06  | -2.20208 |
| 1427123_s_at | coatomer protein complex, subunit gamma 2, antisense 2                           | Copg2as2                     | 0.0001939 | -2.20024 |
| 1421287_a_at | platelet/endothelial cell adhesion molecule 1                                    | Pecam1                       | 1.26E-05  | -2.19921 |
| 1421253_at   | nebulin-related anchoring protein                                                | Nrap                         | 0.0001952 | -2.19428 |
| 1419302_at   | hairy/enhancer-of-split related with YRPW motif-like                             | Heyl                         | 7.00E-05  | -2.19368 |
| 1434341_x_at | RIKEN cDNA 1110020P15 gene /// predicted gene, EG622178                          | 1110020P15Rik /// EG622178   | 1.41E-05  | -2.19291 |
| 1432331_a_at | paired related homeobox 2                                                        | Prrx2                        | 0.0007545 | -2.1911  |
| 1457966_at   | Transcribed locus                                                                | ---                          | 0.0003018 | -2.18941 |
| 1430672_at   | RIKEN cDNA 5033418A18 gene                                                       | 5033418A18Rik                | 8.51E-06  | -2.18577 |
| 1444472_at   | ---                                                                              | ---                          | 3.47E-05  | -2.18322 |
| 1443947_at   | LIM and senescent cell antigen-like domains 1                                    | Lims1                        | 3.50E-05  | -2.18319 |
| 1452382_at   | dynamamin 3, opposite strand                                                     | Dnm3os                       | 2.13E-06  | -2.18132 |
| 1423367_at   | wingless-related MMTV integration site 7A                                        | Wnt7a                        | 7.00E-05  | -2.18126 |
| 1435541_at   | betacellulin, epidermal growth factor family member                              | Btc                          | 1.22E-05  | -2.18029 |
| 1445200_at   | ---                                                                              | ---                          | 0.0002794 | -2.17796 |
| 1448554_s_at | myosin, heavy polypeptide 6, cardiac muscle, alpha /// myosin, heavy polypeptide | LOC674761 /// Myh6 /// Myh7  | 1.52E-05  | -2.1772  |
| 1439336_at   | Transcribed locus                                                                | ---                          | 0.0001095 | -2.17612 |



|              |                                                                                  |                        |           |          |
|--------------|----------------------------------------------------------------------------------|------------------------|-----------|----------|
| 1440513_at   | expressed sequence C80258                                                        | C80258                 | 5.49E-05  | -2.17575 |
| 1426865_a_at | neural cell adhesion molecule 1                                                  | Ncam1                  | 0.0001728 | -2.1749  |
| 1423771_at   | protein kinase C, delta binding protein                                          | Prkcdbp                | 7.34E-05  | -2.17484 |
| 1443335_at   | ---                                                                              | ---                    | 0.0004413 | -2.17131 |
| 1437784_at   | runr-related transcription factor 1; translocated to, 1 (cyclin D-related)       | Runx1t1                | 0.0001519 | -2.17112 |
| 1435361_at   | sema domain, immunoglobulin domain (Ig), short basic domain, secreted, (semaphor | Sema3g                 | 0.0001351 | -2.17076 |
| 1422912_at   | bone morphogenetic protein 4                                                     | Bmp4                   | 4.37E-05  | -2.16788 |
| 1424186_at   | coiled-coil domain containing 80                                                 | Ccdc80                 | 1.28E-06  | -2.16702 |
| 1421117_at   | dystonin                                                                         | Dst                    | 2.46E-06  | -2.1664  |
| 1444401_at   | ---                                                                              | ---                    | 0.000198  | -2.16495 |
| 1454959_s_at | guanine nucleotide binding protein (G protein), alpha inhibiting 1               | Gnai1                  | 4.14E-05  | -2.1615  |
| 1446445_at   | Transcribed locus                                                                | ---                    | 0.0001473 | -2.16105 |
| 1456397_at   | cadherin 4                                                                       | Cdh4                   | 7.39E-05  | -2.15973 |
| 1440093_at   | endothelin receptor type A                                                       | Ednra                  | 5.99E-06  | -2.15902 |
| 1426517_at   | guanine nucleotide binding protein, alpha z subunit                              | Gnaz                   | 0.0002162 | -2.15778 |
| 1426858_at   | inhibin beta-B /// similar to Inhbb protein                                      | Inhbb /// LOC100046802 | 1.53E-05  | -2.15536 |
| 1438072_at   | Transcribed locus                                                                | ---                    | 7.88E-05  | -2.15527 |
| 1442837_at   | ---                                                                              | ---                    | 0.0001832 | -2.15342 |
| 1417567_at   | catenin beta interacting protein 1                                               | Ctnnbip1               | 0.0001296 | -2.15329 |
| 1418175_at   | vitamin D receptor                                                               | Vdr                    | 0.0001725 | -2.15319 |
| 1423341_at   | chondroitin sulfate proteoglycan 4                                               | Cspg4                  | 0.0001254 | -2.15249 |
| 1449335_at   | tissue inhibitor of metalloproteinase 3                                          | Timp3                  | 9.98E-06  | -2.15224 |
| 1437066_at   | zinc finger and BTB domain containing 20                                         | Zbtb20                 | 7.76E-06  | -2.15141 |
| 1440440_at   | Transcribed locus                                                                | ---                    | 0.0005472 | -2.15118 |
| 1438602_s_at | mannan-binding lectin serine peptidase 1                                         | Masp1                  | 0.001197  | -2.14856 |
| 1440637_at   | ---                                                                              | ---                    | 0.0001001 | -2.14681 |
| 1446636_at   | tensin 3                                                                         | Tns3                   | 7.07E-05  | -2.14448 |
| 1417297_at   | inositol 1,4,5-triphosphate receptor 3                                           | Itpr3                  | 3.50E-05  | -2.1437  |
| 1446953_at   | ---                                                                              | ---                    | 1.40E-06  | -2.14263 |
| 1445481_at   | expressed sequence AI317158                                                      | AI317158               | 2.47E-05  | -2.14137 |
| 1419301_at   | frizzled homolog 4 (Drosophila)                                                  | Fzd4                   | 0.0001698 | -2.1406  |
| 1419621_at   | ankyrin repeat domain 2 (stretch responsive muscle)                              | Ankrd2                 | 4.57E-05  | -2.14046 |
| 1417795_at   | cell adhesion molecule with homology to L1CAM                                    | Chl1                   | 5.30E-05  | -2.14024 |
| 1448617_at   | CD53 antigen                                                                     | Cd53                   | 4.99E-06  | -2.13985 |
| 1424680_at   | expressed sequence BB146404                                                      | BB146404               | 2.52E-05  | -2.1383  |
| 1445402_at   | ---                                                                              | ---                    | 0.0008808 | -2.137   |
| 1419282_at   | chemokine (C-C motif) ligand 12 /// similar to monocyte chemoattractant protein- | Ccl12 /// LOC100048556 | 4.17E-05  | -2.13304 |
| 1447147_at   | ---                                                                              | ---                    | 0.0003434 | -2.12988 |
| 1418051_at   | Eph receptor B6                                                                  | Ephb6                  | 4.51E-05  | -2.12874 |
| 1445395_at   | Transcribed locus                                                                | ---                    | 0.0027069 | -2.1286  |
| 1425784_a_at | olfactomedin 1                                                                   | Olfm1                  | 0.0002721 | -2.12823 |
| 1458389_at   | Transcribed locus                                                                | ---                    | 0.0001181 | -2.12641 |
| 1451577_at   | zinc finger and BTB domain containing 20                                         | Zbtb20                 | 1.87E-05  | -2.12614 |
| 1439895_at   | expressed sequence AU021025                                                      | AU021025               | 6.32E-06  | -2.1258  |
| 1438236_at   | nuclear factor I/A                                                               | Nfia                   | 7.83E-05  | -2.12531 |

|              |                                                                                  |                                 |           |           |
|--------------|----------------------------------------------------------------------------------|---------------------------------|-----------|-----------|
| 1430352_at   | a disintegrin-like and metallopeptidase (reprolysin type) with thrombospondin ty | Adamts9                         | 1.91E-05  | -2.1232   |
| 1447345_at   | ---                                                                              | ---                             | 0.0002831 | -2.12261  |
| 1439652_at   | ---                                                                              | ---                             | 2.92E-05  | -2.12231  |
| 1442760_x_at | ---                                                                              | ---                             | 0.0002084 | -2.12194  |
| 1418086_at   | protein phosphatase 1, regulatory (inhibitor) subunit 14A                        | Ppp1r14a                        | 0.000106  | -2.12184  |
| 1452205_x_at | T-cell receptor beta, joining region /// similar to T cell antigen receptor ///  | LOC381765 /// LOC665506 //      | 0.0001003 | -2.12168  |
| 1427017_at   | special AT-rich sequence binding protein 2                                       | Satb2                           | 0.0003136 | -2.12131  |
| 1429344_at   | hypothetical 9130022E09                                                          |                                 | 9.13E+15  | 0.0005926 |
| 1416759_at   | microtubule associated monooxygenase, calponin and LIM domain containing 1       | Mical1                          | 0.0001851 | -2.12004  |
| 1457447_at   | Transcribed locus                                                                | ---                             | 8.92E-05  | -2.11878  |
| 1440121_at   | Transcribed locus                                                                | ---                             | 0.0001691 | -2.11873  |
| 1451342_at   | spondin 1, (f-spondin) extracellular matrix protein                              | Spon1                           | 1.18E-06  | -2.11861  |
| 1417505_s_at | interleukin 11 receptor, alpha chain 1 /// interleukin 11 receptor, alpha chain  | Il11ra1 /// Il11ra2 /// LOC1000 | 2.45E-06  | -2.11772  |
| 1419220_at   | xin actin-binding repeat containing 1                                            | Xirp1                           | 0.0002951 | -2.11765  |
| 1417653_at   | parvalbumin                                                                      | Pvalb                           | 7.49E-05  | -2.11424  |
| 1447295_at   | ---                                                                              | ---                             | 0.0001141 | -2.11     |
| 1415968_a_at | kidney androgen regulated protein                                                | Kap                             | 0.0002253 | -2.10216  |
| 1429159_at   | inter-alpha (globulin) inhibitor H5                                              | Itih5                           | 0.0001638 | -2.10202  |
| 1419463_at   | chloride channel calcium activated 2                                             | Clca2                           | 7.72E-05  | -2.1018   |
| 1452766_at   | tubulin polymerization promoting protein                                         | Tppp                            | 0.0024226 | -2.10151  |
| 1441671_at   | Transcribed locus                                                                | ---                             | 0.005286  | -2.10017  |
| 1433147_at   | caldesmon 1                                                                      | Cald1                           | 0.0001224 | -2.09921  |
| 1418599_at   | collagen, type XI, alpha 1                                                       | Col11a1                         | 0.0008189 | -2.09748  |
| 1450148_at   | mucoilin 3                                                                       | Mcoln3                          | 0.0008758 | -2.09693  |
| 1438878_at   | RIKEN cDNA 6430537K16 gene                                                       | 6430537K16Rik                   | 4.85E-06  | -2.09568  |
| 1444384_at   | Transcribed locus                                                                | ---                             | 1.76E-06  | -2.09372  |
| 1457297_at   | Transcribed locus                                                                | ---                             | 4.31E-05  | -2.09286  |
| 1446326_at   | collagen, type I, alpha 2                                                        | Col1a2                          | 2.13E-05  | -2.09187  |
| 1437695_at   | prokineticin receptor 2                                                          | Prokr2                          | 0.0009519 | -2.09117  |
| 1434553_at   | transmembrane protein 56                                                         | Tmem56                          | 0.0019248 | -2.09041  |
| 1422914_at   | trans-acting transcription factor 5                                              | Sp5                             | 0.0017835 | -2.08905  |
| 1441115_at   | DNA segment, Chr 18, ERATO Doi 232, expressed                                    | D18Erd232e                      | 0.0013769 | -2.08832  |
| 1458585_at   | Transcribed locus                                                                | ---                             | 0.000303  | -2.0873   |
| 1418535_at   | ral guanine nucleotide dissociation stimulator,-like 1                           | Rgl1                            | 0.0002006 | -2.08652  |
| 1417333_at   | RAS p21 protein activator 4                                                      | Rasa4                           | 0.0008984 | -2.08233  |
| 1440441_at   | F-box and leucine-rich repeat protein 7                                          | Fbxl7                           | 0.0004444 | -2.08111  |
| 1450860_at   | leucine aminopeptidase 3                                                         | Lap3                            | 1.70E-06  | -2.08079  |
| 1455096_at   | fibronectin leucine rich transmembrane protein 2                                 | Flrt2                           | 2.49E-05  | -2.08069  |
| 1446598_at   | Transcribed locus                                                                | ---                             | 0.0009172 | -2.07859  |
| 1418370_at   | troponin C, cardiac/slow skeletal                                                | Tnnc1                           | 4.16E-06  | -2.07845  |
| 1443985_at   | zinc finger protein 719                                                          | Zfp719                          | 0.0014719 | -2.07757  |
| 1437360_at   | protocadherin 19                                                                 | Pcdh19                          | 3.31E-05  | -2.07703  |
| 1424797_a_at | paired-like homeodomain transcription factor 2                                   | Pitx2                           | 9.37E-06  | -2.07663  |
| 1439789_at   | ---                                                                              | ---                             | 0.000269  | -2.07573  |
| 1435842_at   | N-acetyltransferase 8-like                                                       | Nat8l                           | 1.12E-06  | -2.07547  |

|              |                                                                                  |                   |           |          |
|--------------|----------------------------------------------------------------------------------|-------------------|-----------|----------|
| 1416811_s_at | cytotoxic T lymphocyte-associated protein 2 alpha /// cytotoxic T lymphocyte-ass | Ctla2a /// Ctla2b | 0.0001945 | -2.07527 |
| 1436200_at   | LON peptidase N-terminal domain and ring finger 3                                | Lonrf3            | 2.55E-05  | -2.07439 |
| 1451424_at   | gamma-aminobutyric acid (GABA-A) receptor, pi                                    | Gabrp             | 8.49E-05  | -2.07434 |
| 1442339_at   | stefin A2 like 1                                                                 | Stfa211           | 0.007779  | -2.07256 |
| 1444073_at   | avian musculoaponeurotic fibrosarcoma (v-maf) AS42 oncogene homolog              | Maf               | 3.80E-05  | -2.07038 |
| 1441228_at   | apolipoprotein L domain containing 1                                             | Apold1            | 2.34E-05  | -2.0693  |
| 1420589_at   | hyaluronan synthase 3                                                            | Has3              | 1.47E-05  | -2.06907 |
| 1456319_at   | ---                                                                              | ---               | 0.0005686 | -2.06852 |
| 1455604_at   | frizzled homolog 5 (Drosophila)                                                  | Fzd5              | 0.0003177 | -2.06834 |
| 1443518_at   | sarcoglycan, epsilon                                                             | Sgce              | 7.24E-05  | -2.06799 |
| 1442276_at   | ---                                                                              | ---               | 1.94E-05  | -2.06774 |
| 1435261_at   | transmembrane and tetratricopeptide repeat containing 1                          | Tmtc1             | 0.000811  | -2.06695 |
| 1426597_s_at | expressed sequence C79267                                                        | C79267            | 0.0001677 | -2.06664 |
| 1441413_at   | ---                                                                              | ---               | 0.0002007 | -2.06632 |
| 1417307_at   | dystrophin, muscular dystrophy                                                   | Dmd               | 0.0001408 | -2.06628 |
| 1458467_at   | RIKEN cDNA 1110032D16 gene                                                       | 1110032D16Rik     | 0.0005627 | -2.06452 |
| 1447791_s_at | guanine nucleotide binding protein, alpha 14                                     | Gna14             | 8.02E-06  | -2.06347 |
| 1450754_at   | calcium channel, voltage-dependent, alpha 2/delta subunit 2                      | Cacna2d2          | 0.0001308 | -2.06169 |
| 1423537_at   | growth associated protein 43                                                     | Gap43             | 0.0001036 | -2.06124 |
| 1425215_at   | free fatty acid receptor 2                                                       | Ffar2             | 0.0002634 | -2.06106 |
| 1433266_at   | RIKEN cDNA 2810416A17 gene                                                       | 2810416A17Rik     | 0.0003174 | -2.05727 |
| 1447227_at   | Transcribed locus                                                                | ---               | 0.0002854 | -2.05723 |
| 1425854_x_at | similar to T-cell receptor beta-2 chain C region                                 | LOC665506         | 0.0001004 | -2.0567  |
| 1424893_at   | nuclear distribution gene E-like homolog 1 (A. nidulans)                         | Ndel1             | 0.0004684 | -2.05666 |
| 1446525_at   | ---                                                                              | ---               | 8.31E-05  | -2.05491 |
| 1424567_at   | tetraspanin 2                                                                    | Tspan2            | 0.0003326 | -2.05436 |
| 1447480_at   | ---                                                                              | ---               | 0.0023265 | -2.05384 |
| 1440840_at   | RIKEN cDNA D630004K10 gene                                                       | D630004K10Rik     | 0.0001834 | -2.05285 |
| 1435393_at   | melanocortin 1 receptor                                                          | Mc1r              | 0.0004683 | -2.05282 |
| 1444159_at   | ---                                                                              | ---               | 4.48E-05  | -2.05242 |
| 1458113_at   | RIKEN cDNA 9530019H20 gene                                                       | 9530019H20Rik     | 7.63E-05  | -2.05213 |
| 1446461_at   | ---                                                                              | ---               | 0.0007918 | -2.05119 |
| 1445178_at   | SH3 domain containing ring finger 1                                              | Sh3rf1            | 0.0009129 | -2.04983 |
| 1441776_at   | tetraspanin 11                                                                   | Tspan11           | 0.0001063 | -2.04875 |
| 1425612_at   | cut-like homeobox 1                                                              | Cux1              | 0.0015496 | -2.04814 |
| 1420549_at   | guanylate nucleotide binding protein 1                                           | Gbp1              | 0.0003514 | -2.04731 |
| 1458892_at   | RIKEN cDNA 9430047G12 gene                                                       | 9430047G12Rik     | 2.06E-05  | -2.046   |
| 1426864_a_at | neural cell adhesion molecule 1                                                  | Ncam1             | 1.80E-05  | -2.04597 |
| 1439580_at   | RIKEN cDNA B930053N05 gene                                                       | B930053N05Rik     | 0.0010122 | -2.04586 |
| 1458125_at   | ---                                                                              | ---               | 0.0003479 | -2.04511 |
| 1423954_at   | complement component 3                                                           | C3                | 0.000139  | -2.04496 |
| 1445420_at   | Transcribed locus                                                                | ---               | 0.0006487 | -2.0433  |
| 1435284_at   | reticulon 4                                                                      | Rtn4              | 5.47E-05  | -2.0429  |
| 1439556_at   | neural cell adhesion molecule 1                                                  | Ncam1             | 4.67E-05  | -2.04208 |
| 1460531_at   | RIKEN cDNA 2900069M18 gene                                                       | 2900069M18Rik     | 0.00108   | -2.04144 |

|              |                                                                                  |                               |           |          |
|--------------|----------------------------------------------------------------------------------|-------------------------------|-----------|----------|
| 1449799_s_at | plakophilin 2                                                                    | Pkp2                          | 0.0002703 | -2.04142 |
| 1444878_at   | Transcribed locus                                                                | ---                           | 0.0005774 | -2.04101 |
| 1437466_at   | activated leukocyte cell adhesion molecule                                       | Alcam                         | 7.34E-05  | -2.03991 |
| 1446346_at   | Transcribed locus, moderately similar to NP_891550.1 ADAM metallopeptidase with  | ---                           | 0.0004708 | -2.03915 |
| 1429113_at   | RIKEN cDNA 2900092E17 gene /// proline-rich transmembrane protein 2              | 2900092E17Rik /// Prrt2       | 9.83E-05  | -2.03909 |
| 1439299_at   | Transcribed locus                                                                | ---                           | 0.0002676 | -2.03902 |
| 1435558_at   | brain-specific angiogenesis inhibitor 2 /// similar to Brain-specific angiogenes | Bai2 /// LOC100048816         | 0.0007199 | -2.03848 |
| 1446742_at   | Nuclear factor I/A                                                               | Nfia                          | 0.0015178 | -2.03786 |
| 1449204_at   | gap junction protein, beta 5                                                     | Gjb5                          | 7.74E-05  | -2.03725 |
| 1454995_at   | ---                                                                              | ---                           | 0.0001758 | -2.03596 |
| 1433837_at   | RIKEN cDNA 8430408G22 gene                                                       | 8430408G22Rik                 | 7.57E-06  | -2.03585 |
| 1417814_at   | phospholipase A2, group V                                                        | Pla2g5                        | 2.65E-05  | -2.03448 |
| 1436218_at   | Transcribed locus                                                                | ---                           | 5.42E-05  | -2.03459 |
| 1452906_at   | maternally expressed 3                                                           | Meg3                          | 0.0004823 | -2.03339 |
| 1440905_at   | Heparan sulfate 2-O-sulfotransferase 1                                           | Hs2st1                        | 0.0001248 | -2.03219 |
| 1429219_at   | RIKEN cDNA 1200009F10 gene                                                       | 1200009F10Rik                 | 0.0003748 | -2.03104 |
| 1443185_at   | lipoma HMGIC fusion partner-like 2                                               | Lhfp12                        | 4.70E-05  | -2.0307  |
| 1425894_at   | MAS-related GPR, member F                                                        | Mrgprf                        | 8.88E-05  | -2.02912 |
| 1449058_at   | GLI-Kruppel family member GLI1                                                   | Gli1                          | 1.89E-05  | -2.02791 |
| 1436555_at   | solute carrier family 7 (cationic amino acid transporter, y+ system), member 2   | Slc7a2                        | 0.0003773 | -2.02666 |
| 1430191_at   | RIKEN cDNA 9130004J05 gene                                                       | 9130004J05Rik                 | 2.80E-05  | -2.02577 |
| 1420715_a_at | peroxisome proliferator activated receptor gamma                                 | Pparg                         | 9.24E-05  | -2.02559 |
| 1423407_a_at | fibulin 2                                                                        | Fbln2                         | 0.0001185 | -2.02356 |
| 1451972_at   | glucocorticoid induced transcript 1 /// predicted gene, EG545216 /// similar to  | EG545216 /// Glcci1 /// LOC1  | 0.0001878 | -2.02312 |
| 1423551_at   | cadherin 13                                                                      | Cdh13                         | 9.69E-05  | -2.02261 |
| 1451969_s_at | poly (ADP-ribose) polymerase family, member 3                                    | Parp3                         | 4.90E-05  | -2.02121 |
| 1435697_a_at | pleckstrin homology, Sec7 and coiled-coil domains, binding protein               | Pscdbp                        | 0.000798  | -2.02034 |
| 1419126_at   | homeo box D9                                                                     | Hoxd9                         | 4.61E-05  | -2.01934 |
| 1458880_at   | Transcribed locus                                                                | ---                           | 6.69E-05  | -2.01732 |
| 1428833_at   | RIKEN cDNA 4930406D14 gene                                                       | 4930406D14Rik                 | 0.0001031 | -2.01494 |
| 1456346_at   | Transcribed locus                                                                | ---                           | 0.0012169 | -2.01311 |
| 1448482_at   | solute carrier family 39 (metal ion transporter), member 8                       | Slc39a8                       | 0.0054474 | -2.01127 |
| 1435486_at   | p21 (CDKN1A)-activated kinase 3                                                  | Pak3                          | 0.0006753 | -2.01043 |
| 1430264_at   | RIKEN cDNA 2610030P05 gene                                                       | 2610030P05Rik                 | 0.0001861 | -2.00982 |
| 1425506_at   | myosin, light polypeptide kinase                                                 | Mylk                          | 1.32E-05  | -2.00956 |
| 1441370_at   | Transmembrane and coiled coil domains 1                                          | Tmcc1                         | 2.64E-05  | -2.00756 |
| 1419483_at   | complement component 3a receptor 1                                               | C3ar1                         | 0.0002281 | -2.00459 |
| 1434275_at   | naked cuticle 2 homolog (Drosophila)                                             | Nkd2                          | 1.53E-05  | -2.00428 |
| 1441055_at   | A kinase (PRKA) anchor protein 2 /// paralemmin 2 /// Palm2-Akap2 protein        | Akap2 /// Palm2 /// Palm2-aka | 0.0007255 | -2.0041  |
| 1459321_at   | ---                                                                              | ---                           | 0.001717  | -2.00382 |
| 1436907_at   | neuron navigator 1                                                               | Nav1                          | 0.0001193 | -2.00338 |
| 1450234_at   | membrane-spanning 4-domains, subfamily A, member 6C                              | Ms4a6c                        | 6.36E-06  | -2.00295 |
| 1457782_at   | talin 1                                                                          | Tln1                          | 0.0010335 | -2.00276 |
| 1417812_a_at | laminin, beta 3                                                                  | Lamb3                         | 4.38E-05  | -2.00272 |
| 1441629_at   | ---                                                                              | ---                           | 3.57E-05  | -2.00116 |

|              |                                                                                  |                              |           |          |
|--------------|----------------------------------------------------------------------------------|------------------------------|-----------|----------|
| 1418596_at   | fibroblast growth factor receptor 4                                              | Fgfr4                        | 7.91E-05  | -2.00103 |
| 1418487_at   | receptor-interacting serine-threonine kinase 4                                   | Ripk4                        | 0.0055426 | 2.00071  |
| 1449107_at   | nudix (nucleoside diphosphate linked moiety X)-type motif 4                      | Nudt4                        | 1.27E-05  | 2.00279  |
| 1459381_at   | Transcribed locus                                                                | ---                          | 0.0007158 | 2.00291  |
| 1452151_at   | GRAM domain containing 4                                                         | Gramd4                       | 1.92E-05  | 2.00355  |
| 1420618_at   | cytoplasmic polyadenylation element binding protein 4                            | Cpeb4                        | 0.0255525 | 2.00364  |
| 1427492_at   | premature ovarian failure 1B                                                     | Pof1b                        | 8.41E-05  | 2.00464  |
| 1440200_at   | RIKEN cDNA 9630031F12 gene                                                       | 9630031F12Rik                | 0.0010464 | 2.00501  |
| 1417214_at   | RAB27b, member RAS oncogene family                                               | Rab27b                       | 0.0027741 | 2.00879  |
| 1452357_at   | glycoprotein Ib, beta polypeptide /// septin 5                                   | Gp1bb /// Sept5              | 8.40E-06  | 2.00945  |
| 1435342_at   | potassium inwardly-rectifying channel, subfamily K, member 6                     | Kcnk6                        | 7.16E-05  | 2.01013  |
| 1431692_a_at | Casitas B-lineage lymphoma c                                                     | Cblc                         | 0.0006364 | 2.01043  |
| 1453020_at   | RIKEN cDNA 1810048J11 gene                                                       | 1810048J11Rik                | 0.00019   | 2.01098  |
| 1456036_x_at | glutathione S-transferase omega 1                                                | Gsto1                        | 0.0095699 | 2.01301  |
| 1450251_a_at | ligand of numb-protein X 1                                                       | Lnx1                         | 0.0020207 | 2.01314  |
| 1455601_at   | Transcribed locus, strongly similar to NP_001100786.1 malignant fibrous histiocy | ---                          | 0.0001439 | 2.01523  |
| 1451196_at   | yippee-like 5 (Drosophila)                                                       | Ypel5                        | 2.94E-05  | 2.01599  |
| 1424730_a_at | solute carrier family 15 (H+/peptide transporter), member 2                      | Slc15a2                      | 0.0004954 | 2.01604  |
| 1448455_at   | ceroid-lipofuscinosis, neuronal 8                                                | Cln8                         | 0.0001922 | 2.01682  |
| 1432374_a_at | DNA segment, Chr 5, Wayne State University 178, expressed                        | D5Wsu178e                    | 0.0008822 | 2.01867  |
| 1452070_at   | death effector domain-containing DNA binding protein 2                           | Dedd2                        | 0.0001278 | 2.01932  |
| 1434358_x_at | ribosomal protein S21                                                            | Rps21                        | 0.0160721 | 2.02157  |
| 1434499_a_at | lactate dehydrogenase B                                                          | Ldhb                         | 0.0151944 | 2.02187  |
| 1424383_at   | transmembrane protein 51                                                         | Tmem51                       | 2.27E-05  | 2.023    |
| 1426436_at   | transmembrane protein 159                                                        | Tmem159                      | 9.96E-06  | 2.02333  |
| 1425139_at   | sestrin 2                                                                        | Sesn2                        | 0.0004915 | 2.02357  |
| 1455509_at   | cDNA sequence AB182283                                                           | AB182283                     | 0.0003676 | 2.02447  |
| 1420683_at   | BCL2/adenovirus E1B 19kD interacting protein like                                | Bnpl                         | 0.0004224 | 2.02525  |
| 1433424_at   | ---                                                                              | ---                          | 0.0037004 | 2.02541  |
| 1442187_at   | Bradykinin receptor, beta 2                                                      | Bdkrb2                       | 5.45E-05  | 2.02668  |
| 1422835_at   | potassium voltage-gated channel, Shal-related family, member 2                   | Kcnd2                        | 0.0006529 | 2.0273   |
| 1430777_a_at | golgi phosphoprotein 3                                                           | Golph3                       | 0.0004689 | 2.02999  |
| 1430128_a_at | receptor accessory protein 6                                                     | Reep6                        | 3.95E-05  | 2.03135  |
| 1458518_at   | cytoplasmic polyadenylation element binding protein 2                            | Cpeb2                        | 0.0001831 | 2.0323   |
| 1423271_at   | gap junction protein, beta 2                                                     | Gjb2                         | 9.92E-07  | 2.03318  |
| 1426913_at   | lanosterol synthase                                                              | Lss                          | 0.0004452 | 2.03349  |
| 1426261_s_at | UDP glucuronosyltransferase 1 family, polypeptide A2 /// UDP glucuronosyltransfe | LOC632297 /// Ugt1a1 /// Ugt | 0.0001525 | 2.03736  |
| 1442863_at   | calcium channel, voltage-dependent, alpha 2/delta subunit 4                      | Cacna2d4                     | 0.0007078 | 2.03848  |
| 1451798_at   | interleukin 1 receptor antagonist                                                | Il1rn                        | 1.43E-05  | 2.03899  |
| 1425568_a_at | transmembrane protein 33                                                         | Tmem33                       | 0.0013567 | 2.04006  |
| 1451410_a_at | cysteine-rich protein 3                                                          | Crip3                        | 3.66E-05  | 2.04043  |
| 1460190_at   | adaptor protein complex AP-1, mu 2 subunit                                       | Ap1m2                        | 5.35E-05  | 2.04244  |
| 1434970_a_at | mitochondrial ribosomal protein L15                                              | Mrpl15                       | 0.0014056 | 2.04415  |
| 1439897_at   | nebulette                                                                        | Nebi                         | 0.0001463 | 2.04417  |
| 1451355_at   | N-acylsphingosine amidohydrolase 3-like                                          | Asah3l                       | 0.0001648 | 2.04477  |

|              |                                                                                  |                       |           |         |
|--------------|----------------------------------------------------------------------------------|-----------------------|-----------|---------|
| 1452329_at   | pleckstrin homology domain containing, family N member 1                         | Plekhn1               | 3.81E-05  | 2.04556 |
| 1453103_at   | actin-binding LIM protein 1                                                      | Ablim1                | 7.71E-05  | 2.04666 |
| 1423305_at   | exostoses (multiple)-like 1                                                      | Extl1                 | 8.51E-05  | 2.04819 |
| 1437698_at   | myosin Vb                                                                        | Myo5b                 | 0.00169   | 2.04863 |
| 1437455_a_at | B-cell translocation gene 1, anti-proliferative /// similar to myocardial vascul | Btg1 /// LOC100047353 | 0.0398999 | 2.04994 |
| 1417871_at   | hydroxysteroid (17-beta) dehydrogenase 7                                         | Hsd17b7               | 5.33E-06  | 2.05128 |
| 1417303_at   | mevalonate (diphospho) decarboxylase                                             | Mvd                   | 0.0014912 | 2.05223 |
| 1422587_at   | transmembrane protein 45a                                                        | Tmem45a               | 5.02E-06  | 2.05358 |
| 1453080_at   | apolipoprotein L 7a                                                              | Apol7a                | 0.0003297 | 2.05506 |
| 1422071_at   | lectin, galactose binding, soluble 6                                             | Lgals6                | 0.0004681 | 2.05549 |
| 1436115_at   | gene model 266, (NCBI)                                                           | Gm266                 | 0.0008709 | 2.05637 |
| 1432027_a_at | TBC1 domain family, member 14                                                    | Tbc1d14               | 0.0001336 | 2.0565  |
| 1442203_at   | hypothetical LOC552880                                                           | LOC552880             | 0.0002901 | 2.05804 |
| 1429354_at   | thioesterase superfamily member 5                                                | Them5                 | 1.52E-05  | 2.05901 |
| 1424072_at   | RIKEN cDNA 2010107G23 gene                                                       | 2010107G23Rik         | 9.04E-05  | 2.0591  |
| 1433854_at   | Transmembrane protein 164                                                        | Tmem164               | 0.0042274 | 2.0616  |
| 1437516_at   | Transcribed locus                                                                | ---                   | 0.0120617 | 2.06195 |
| 1448690_at   | potassium channel, subfamily K, member 1                                         | Kcnk1                 | 5.52E-05  | 2.0623  |
| 1449789_x_at | lymphocyte antigen 6 complex, locus G6C                                          | Ly6g6c                | 0.0003211 | 2.06265 |
| 1441774_at   | Transcribed locus                                                                | ---                   | 0.0010156 | 2.06555 |
| 1426911_at   | desmocollin 2                                                                    | Dsc2                  | 0.0009061 | 2.06688 |
| 1450240_a_at | synaptotagmin-like 1                                                             | Sytl1                 | 8.91E-05  | 2.06956 |
| 1435140_at   | insulin degrading enzyme                                                         | Ide                   | 2.24E-05  | 2.07033 |
| 1431751_a_at | metallophosphoesterase domain containing 2                                       | Mpped2                | 1.86E-05  | 2.07163 |
| 1454793_x_at | DEAD (Asp-Glu-Ala-Asp) box polypeptide 5                                         | Ddx5                  | 0.0317073 | 2.07266 |
| 1418816_at   | chromatin modifying protein 1B                                                   | Chmp1b                | 0.0005138 | 2.07271 |
| 1430979_a_at | peroxiredoxin 2                                                                  | Prdx2                 | 0.0006737 | 2.073   |
| 1458680_at   | Transcribed locus                                                                | ---                   | 0.0003041 | 2.07315 |
| 1440651_at   | ---                                                                              | ---                   | 0.0013702 | 2.07583 |
| 1453092_at   | cysteine-rich C-terminal 1                                                       | Crct1                 | 1.89E-05  | 2.07746 |
| 1452318_a_at | heat shock protein 1B                                                            | Hspa1b                | 0.0027862 | 2.07842 |
| 1418018_at   | carboxypeptidase D                                                               | Cpd                   | 1.01E-06  | 2.07962 |
| 1422783_a_at | keratin 6A                                                                       | Krt6a                 | 0.0014905 | 2.08043 |
| 1455519_at   | desmoglein 1 beta                                                                | Dsg1b                 | 0.0163847 | 2.08142 |
| 1460354_a_at | mitochondrial ribosomal protein L13                                              | Mrpl13                | 0.0198384 | 2.08177 |
| 1423946_at   | PDZ and LIM domain 2                                                             | Pdlim2                | 0.0002641 | 2.0824  |
| 1453768_a_at | RIKEN cDNA 5430432M24 gene                                                       | 5430432M24Rik         | 0.0001806 | 2.08251 |
| 1454042_a_at | serine/arginine-rich protein specific kinase 1                                   | Srpk1                 | 7.10E-05  | 2.08258 |
| 1437581_at   | zinc finger protein 800                                                          | Zfp800                | 0.0009752 | 2.08423 |
| 1449001_at   | isovaleryl coenzyme A dehydrogenase                                              | Ivd                   | 8.08E-05  | 2.08651 |
| 1452203_at   | oligonucleotide/oligosaccharide-binding fold containing 2A                       | Obfc2a                | 0.0001117 | 2.08756 |
| 1449256_a_at | RAB11a, member RAS oncogene family                                               | Rab11a                | 1.96E-07  | 2.08836 |
| 1418748_at   | caspase 14                                                                       | Casp14                | 3.43E-07  | 2.08959 |
| 1448551_a_at | tripartite motif-containing 2                                                    | Trim2                 | 3.23E-05  | 2.0912  |
| 1424030_at   | grainyhead-like 1 (Drosophila) /// similar to Grh1 protein                       | Grh1 /// LOC100043996 | 2.46E-05  | 2.09158 |

|              |                                                                                 |                 |           |         |
|--------------|---------------------------------------------------------------------------------|-----------------|-----------|---------|
| 1421872_at   | RAB24, member RAS oncogene family                                               | Rab24           | 3.72E-05  | 2.09198 |
| 1423952_a_at | keratin 7                                                                       | Krt7            | 3.22E-05  | 2.09253 |
| 1439173_at   | hook homolog 1 (Drosophila)                                                     | Hook1           | 0.0001135 | 2.09319 |
| 1417029_a_at | tripartite motif-containing 2                                                   | Trim2           | 3.40E-05  | 2.0944  |
| 1451767_at   | neutrophil cytosolic factor 1                                                   | Ncf1            | 0.0003693 | 2.09459 |
| 1434416_a_at | small optic lobes homolog (Drosophila)                                          | Solh            | 0.0014282 | 2.09572 |
| 1452412_at   | homeo box C8                                                                    | Hoxc8           | 0.0003935 | 2.09829 |
| 1419027_s_at | glycolipid transfer protein                                                     | Gltg            | 1.07E-06  | 2.099   |
| 1419917_s_at | transmembrane emp24 protein transport domain containing 7                       | Tmed7           | 0.0294092 | 2.1004  |
| 1434272_at   | cytoplasmic polyadenylation element binding protein 2                           | Cpeb2           | 0.0332721 | 2.10046 |
| 1442063_at   | ADAMTS-like 1                                                                   | Adamts1         | 0.0010009 | 2.10212 |
| 1439137_at   | solute carrier family 4, sodium bicarbonate cotransporter, member 9             | Slc4a9          | 0.000469  | 2.10227 |
| 1431176_at   | chromatin modifying protein 4C                                                  | Chmp4c          | 0.0009314 | 2.10242 |
| 1450093_s_at | zinc finger and BTB domain containing 7a                                        | Zbtb7a          | 0.0001555 | 2.10728 |
| 1456891_at   | DENN/MADD domain containing 2C                                                  | Dennd2c         | 0.0004561 | 2.10756 |
| 1451599_at   | sestrin 2                                                                       | Sesn2           | 0.0002374 | 2.10807 |
| 1458882_at   | serine (or cysteine) peptidase inhibitor, clade B, member 8                     | Serpinb8        | 0.0011115 | 2.10954 |
| 1437909_at   | Snf2-related CREBBP activator protein                                           | Srcap           | 3.40E-06  | 2.11054 |
| 1435354_at   | potassium inwardly-rectifying channel, subfamily J, member 15                   | Kcnj15          | 0.0002907 | 2.11152 |
| 1429684_at   | RIKEN cDNA 5830472M02 gene                                                      | 5830472M02Rik   | 6.44E-05  | 2.11184 |
| 1433968_a_at | multiple EGF-like-domains 9                                                     | Megf9           | 0.0012781 | 2.1132  |
| 1447277_s_at | prenylcysteine oxidase 1                                                        | Pcyox1          | 0.0061658 | 2.11365 |
| 1449855_s_at | ubiquitin carboxyl-terminal esterase L3 (ubiquitin thiolesterase) /// ubiquitin | Uchl3 /// Uchl4 | 5.76E-05  | 2.11433 |
| 1415943_at   | syndecan 1                                                                      | Sdc1            | 5.44E-06  | 2.11728 |
| 1422506_a_at | cystatin B                                                                      | Cstb            | 8.03E-06  | 2.11729 |
| 1422966_a_at | transferrin receptor                                                            | Tfrc            | 0.0009021 | 2.12146 |
| 1427610_at   | ---                                                                             | ---             | 0.0018714 | 2.12257 |
| 1423747_a_at | pyruvate dehydrogenase kinase, isoenzyme 1                                      | Pdk1            | 0.0074726 | 2.12411 |
| 1441917_s_at | transmembrane protein 40                                                        | Tmem40          | 0.0001328 | 2.12479 |
| 1426098_a_at | calpastatin                                                                     | Cast            | 0.000128  | 2.12658 |
| 1435069_at   | cDNA sequence BC064078                                                          | BC064078        | 0.0004948 | 2.12693 |
| 1457011_at   | Transcribed locus                                                               | ---             | 0.0008395 | 2.12712 |
| 1441794_at   | Transcribed locus                                                               | ---             | 9.17E-05  | 2.12737 |
| 1433743_at   | dachshund 1 (Drosophila)                                                        | Dach1           | 0.0063323 | 2.12954 |
| 1416795_at   | crystallin, lambda 1                                                            | Cryl1           | 7.90E-05  | 2.13121 |
| 1434773_a_at | solute carrier family 2 (facilitated glucose transporter), member 1             | Slc2a1          | 0.0003042 | 2.13137 |
| 1454842_a_at | UDP-GalNAc:betaGlcNAc beta 1,3-galactosaminyltransferase, polypeptide 2         | B3galnt2        | 0.0100259 | 2.13138 |
| 1421268_at   | UDP-glucose ceramide glucosyltransferase                                        | Ugcg            | 0.00019   | 2.13235 |
| 1417942_at   | Ly6/Plaur domain containing 3                                                   | Lypd3           | 4.05E-05  | 2.13262 |
| 1436957_at   | gamma-aminobutyric acid (GABA-A) receptor, subunit alpha 3                      | Gabra3          | 0.0012048 | 2.13366 |
| 1426439_at   | DEAD (Asp-Glu-Ala-Asp) box polypeptide 3, Y-linked                              | Ddx3y           | 0.0069275 | 2.13489 |
| 1428420_a_at | RIKEN cDNA 1200009I06 gene                                                      | 1200009I06Rik   | 1.61E-05  | 2.1361  |
| 1419086_at   | fibroblast growth factor binding protein 1                                      | Fgfbp1          | 4.76E-05  | 2.13624 |
| 1422178_a_at | RAB17, member RAS oncogene family                                               | Rab17           | 0.0004428 | 2.1364  |
| 1440484_at   | unc-5 homolog D (C. elegans)                                                    | Unc5d           | 8.02E-05  | 2.13726 |

|              |                                                                                  |                               |           |         |
|--------------|----------------------------------------------------------------------------------|-------------------------------|-----------|---------|
| 1433486_at   | chloride channel 3                                                               | Clcn3                         | 0.0007646 | 2.13844 |
| 1421836_at   | microtubule-associated protein 7                                                 | Mtap7                         | 2.10E-05  | 2.13869 |
| 1448207_at   | LIM and SH3 protein 1                                                            | Lasp1                         | 8.62E-05  | 2.13908 |
| 1434831_a_at | forkhead box O3a                                                                 | Foxo3a                        | 0.0277298 | 2.14195 |
| 1436298_x_at | phosphoribosylaminoimidazole carboxylase, phosphoribosylaminoribosylaminoimidazo | Paics                         | 0.048471  | 2.14195 |
| 1436314_at   | SCY1-like 2 (S. cerevisiae)                                                      | Scyl2                         | 7.56E-05  | 2.1421  |
| 1423121_at   | insulin degrading enzyme                                                         | Ide                           | 2.65E-05  | 2.14354 |
| 1426389_at   | calcium/calmodulin-dependent protein kinase ID                                   | Camk1d                        | 0.0001487 | 2.14731 |
| 1449440_at   | lipin 3                                                                          | Lpin3                         | 4.06E-05  | 2.14888 |
| 1422637_at   | Ras association (RalGDS/AF-6) domain family member 5                             | Rassf5                        | 8.96E-05  | 2.14919 |
| 1427082_at   | RIKEN cDNA 4632417N05 gene                                                       | 4632417N05Rik                 | 2.17E-05  | 2.15204 |
| 1434271_at   | glucosidase beta 2                                                               | Gba2                          | 0.0009192 | 2.15266 |
| 1418735_at   | keratin 4                                                                        | Krt4                          | 7.34E-05  | 2.15613 |
| 1448820_a_at | eukaryotic translation initiation factor 2, subunit 2 (beta) /// similar to Eif2 | Eif2s2 /// LOC100040220 /// L | 0.0243855 | 2.15689 |
| 1438643_at   | Calcium/calmodulin-dependent protein kinase ID                                   | Camk1d                        | 0.0108759 | 2.15748 |
| 1444790_at   | RIKEN cDNA 1810005K13 gene                                                       | 1810005K13Rik                 | 0.0002933 | 2.15817 |
| 1447868_x_at | glutaredoxin 3 /// similar to thioredoxin-like 2                                 | Glr3 /// LOC620016            | 0.0208708 | 2.15902 |
| 1456619_at   | lipase, member H                                                                 | Liph                          | 0.005665  | 2.15902 |
| 1435534_a_at | translocase of outer mitochondrial membrane 20 homolog (yeast)                   | Tomm20                        | 0.0145476 | 2.15964 |
| 1434815_a_at | mitogen-activated protein kinase-activated protein kinase 3                      | Mapkapk3                      | 0.0006111 | 2.15979 |
| 1443594_at   | expressed sequence AI043046                                                      | AI043046                      | 0.0015027 | 2.16012 |
| 1447023_at   | ---                                                                              | ---                           | 7.60E-05  | 2.16076 |
| 1417520_at   | nuclear factor, erythroid derived 2, like 3                                      | Nfe2l3                        | 3.05E-05  | 2.16147 |
| 1418449_at   | ladinin                                                                          | Lad1                          | 3.00E-05  | 2.16306 |
| 1415944_at   | syndecan 1                                                                       | Sdc1                          | 3.20E-05  | 2.16389 |
| 1456317_at   | aldehyde dehydrogenase 3 family, member B2                                       | Aldh3b2                       | 1.97E-05  | 2.16789 |
| 1430313_at   | ADAMTS-like 1                                                                    | Adamts1                       | 0.0008419 | 2.16798 |
| 1421141_a_at | forkhead box P1                                                                  | Foxp1                         | 0.0001448 | 2.17006 |
| 1422784_at   | keratin 6A                                                                       | Krt6a                         | 4.24E-05  | 2.17011 |
| 1426599_a_at | solute carrier family 2 (facilitated glucose transporter), member 1              | Slc2a1                        | 5.03E-05  | 2.17121 |
| 1436976_a_at | YOD1 OTU deubiquitinating enzyme 1 homologue (S. cerevisiae)                     | Yod1                          | 0.0195359 | 2.17301 |
| 1448456_at   | ceroid-lipofuscinosis, neuronal 8                                                | Cln8                          | 0.0008122 | 2.17308 |
| 1460405_at   | Rho guanine nucleotide exchange factor (GEF) 10-like                             | Arhgef10l                     | 1.93E-05  | 2.17325 |
| 1455863_at   | spermatogenesis associated 5-like 1                                              | Spata5l1                      | 0.0001379 | 2.17506 |
| 1443082_at   | ---                                                                              | ---                           | 0.0005346 | 2.17753 |
| 1439747_at   | prostaglandin E synthase                                                         | Ptges                         | 0.0001439 | 2.1776  |
| 1429683_at   | RIKEN cDNA 5830472M02 gene                                                       | 5830472M02Rik                 | 0.0005495 | 2.17785 |
| 1456673_at   | Transcribed locus                                                                | ---                           | 0.0001102 | 2.17955 |
| 1427229_at   | 3-hydroxy-3-methylglutaryl-Coenzyme A reductase                                  | Hmgcr                         | 0.0005397 | 2.18019 |
| 1422007_at   | aquaporin 3                                                                      | Aqp3                          | 7.67E-05  | 2.18102 |
| 1416225_at   | alcohol dehydrogenase 1 (class I)                                                | Adh1                          | 3.22E-05  | 2.18219 |
| 1423937_at   | potassium channel tetramerisation domain containing 5                            | Kctd5                         | 0.0002575 | 2.18435 |
| 1437269_at   | expressed sequence AW124722                                                      | AW124722                      | 4.95E-05  | 2.18608 |
| 1427348_at   | zinc finger CCCH type containing 12A                                             | Zc3h12a                       | 0.0017342 | 2.18655 |
| 1455804_x_at | 3-oxoacid CoA transferase 1                                                      | Oxct1                         | 0.0110132 | 2.18662 |



|              |                                                                                  |                        |           |         |
|--------------|----------------------------------------------------------------------------------|------------------------|-----------|---------|
| 1418990_at   | membrane-spanning 4-domains, subfamily A, member 4D                              | Ms4a4d                 | 0.001594  | 2.18912 |
| 1418792_at   | SH3-domain GRB2-like 2                                                           | Sh3gl2                 | 0.0009614 | 2.19316 |
| 1455241_at   | cDNA sequence BC037703                                                           | BC037703               | 4.01E-06  | 2.19459 |
| 1425026_at   | SFT2 domain containing 2                                                         | Sft2d2                 | 2.83E-05  | 2.20071 |
| 1443869_at   | RIKEN cDNA E430028B21 gene                                                       | E430028B21Rik          | 0.0014768 | 2.20166 |
| 1449453_at   | bone marrow stromal cell antigen 1                                               | Bst1                   | 0.0006951 | 2.20263 |
| 1419051_at   | OVO homolog-like 1 (Drosophila)                                                  | Ovol1                  | 0.0002092 | 2.20364 |
| 1452257_at   | 3-hydroxybutyrate dehydrogenase, type 1                                          | Bdh1                   | 3.78E-06  | 2.20645 |
| 1457248_x_at | hydroxysteroid (17-beta) dehydrogenase 7                                         | Hsd17b7                | 4.43E-05  | 2.20823 |
| 1417891_at   | splA/ryanodine receptor domain and SOCS box containing 3                         | Spsb3                  | 0.0004095 | 2.20874 |
| 1416129_at   | ERBB receptor feedback inhibitor 1                                               | Errfi1                 | 0.0002093 | 2.21225 |
| 1446503_at   | ---                                                                              | ---                    | 1.39E-05  | 2.2149  |
| 1433866_x_at | peroxiredoxin 1                                                                  | Prdx1                  | 0.0233282 | 2.21519 |
| 1445558_at   | RIKEN cDNA 5930430L01 gene                                                       | 5930430L01Rik          | 0.0008522 | 2.21524 |
| 1459898_at   | suprabasin                                                                       | Sbsn                   | 4.17E-06  | 2.21527 |
| 1448663_s_at | mevalonate (diphospho) decarboxylase                                             | Mvd                    | 7.41E-05  | 2.21575 |
| 1421316_at   | late cornified envelope 1G                                                       | Lce1g                  | 0.0007554 | 2.21696 |
| 1437788_at   | trans-acting transcription factor 6                                              | Sp6                    | 3.02E-06  | 2.21723 |
| 1417318_at   | deleted in bladder cancer 1 (human)                                              | Dbc1                   | 0.000334  | 2.21832 |
| 1422846_at   | retinol binding protein 2, cellular                                              | Rbp2                   | 9.84E-05  | 2.21941 |
| 1426440_at   | dehydrogenase/reductase (SDR family) member 7                                    | Dhrs7                  | 6.05E-05  | 2.22152 |
| 1451122_at   | isopentenyl-diphosphate delta isomerase                                          | Idi1                   | 0.0003698 | 2.2217  |
| 1455299_at   | vestigial like 3 (Drosophila)                                                    | Vgll3                  | 4.88E-05  | 2.22186 |
| 1453041_at   | transmembrane protein 16J                                                        | Tmem16j                | 0.0004697 | 2.22663 |
| 1419816_s_at | ERBB receptor feedback inhibitor 1                                               | Errfi1                 | 1.60E-05  | 2.2269  |
| 1425656_a_at | brain-specific angiogenesis inhibitor 1-associated protein 2                     | Baiap2                 | 0.0002158 | 2.2279  |
| 1453943_a_at | acid phosphatase, prostate                                                       | Acpp                   | 8.12E-05  | 2.22828 |
| 1450271_at   | PTK6 protein tyrosine kinase 6                                                   | Ptk6                   | 0.0005103 | 2.22855 |
| 1424029_at   | TSPY-like 4                                                                      | Tspyl4                 | 7.78E-05  | 2.23108 |
| 1438993_a_at | ATPase, H+ transporting, lysosomal V1 subunit D                                  | Atp6v1d                | 0.002577  | 2.23287 |
| 1429565_s_at | late cornified envelope 1M                                                       | Lce1m                  | 0.0013831 | 2.23311 |
| 1417946_at   | abhydrolase domain containing 3                                                  | Abhd3                  | 0.0028374 | 2.23842 |
| 1423938_at   | lethal giant larvae homolog 2 (Drosophila) /// similar to Lethal giant larvae ho | Llgl2 /// LOC100047332 | 0.0003162 | 2.23918 |
| 1450535_at   | keratin associated protein 12-1                                                  | Krtap12-1              | 0.0001415 | 2.2402  |
| 1421269_at   | UDP-glucose ceramide glucosyltransferase                                         | Ugcg                   | 0.0006748 | 2.2423  |
| 1438992_x_at | activating transcription factor 4                                                | Atf4                   | 0.019268  | 2.24464 |
| 1420891_at   | wingless-related MMTV integration site 7B                                        | Wnt7b                  | 0.0002779 | 2.24775 |
| 1419350_at   | hook homolog 2 (Drosophila)                                                      | Hook2                  | 0.0001267 | 2.24776 |
| 1443017_at   | cytoplasmic polyadenylation element binding protein 2                            | Cpeb2                  | 0.0012417 | 2.24978 |
| 1430167_a_at | RWD domain containing 3                                                          | Rwdd3                  | 0.0008831 | 2.25322 |
| 1425551_at   | huntingtin interacting protein 1 related                                         | Hip1r                  | 1.81E-06  | 2.25509 |
| 1430594_at   | RAB11 family interacting protein 1 (class I)                                     | Rab11fp1               | 3.26E-05  | 2.2553  |
| 1440617_at   | carboxypeptidase A6                                                              | Cpa6                   | 0.0002444 | 2.2554  |
| 1421074_at   | cytochrome P450, family 7, subfamily b, polypeptide 1                            | Cyp7b1                 | 0.0006505 | 2.25541 |
| 1434153_at   | src homology 2 domain-containing transforming protein B                          | Shb                    | 6.13E-05  | 2.256   |

|              |                                                                                  |                            |           |         |
|--------------|----------------------------------------------------------------------------------|----------------------------|-----------|---------|
| 1442044_at   | Transcribed locus                                                                | ---                        | 0.0001147 | 2.25967 |
| 1423909_at   | transmembrane protein 176A                                                       | Tmem176a                   | 3.55E-05  | 2.26105 |
| 1448520_at   | DNA cross-link repair 1B, PSO2 homolog (S. cerevisiae)                           | Dclre1b                    | 0.0005462 | 2.26123 |
| 1456772_at   | neutrophil cytosolic factor 1                                                    | Ncf1                       | 2.90E-05  | 2.2617  |
| 1426802_at   | septin 8                                                                         |                            | 0.0001095 | 2.26184 |
| 1422870_at   | homeo box C4                                                                     | Hoxc4                      | 0.0001023 | 2.26202 |
| 1417801_a_at | protein tyrosine phosphatase, receptor-type, F interacting protein, binding prot | Ppfbp2                     | 3.79E-06  | 2.26637 |
| 1451210_at   | phosphatidic acid phosphatase type 2c                                            | Ppap2c                     | 9.18E-05  | 2.26903 |
| 1457123_at   | neuregulin 4                                                                     | Nrg4                       | 0.0002454 | 2.2694  |
| 1421308_at   | carbonic anhydrase 13                                                            | Car13                      | 0.0006764 | 2.26948 |
| 1416290_a_at | proteasome (prosome, macropain) 26S subunit, ATPase, 4                           | Psmc4                      | 0.0433342 | 2.27029 |
| 1453145_at   | RIKEN cDNA 4933439C20 gene                                                       | 4933439C20Rik              | 0.0030345 | 2.27244 |
| 1433549_x_at | ribosomal protein S21                                                            | Rps21                      | 0.0221466 | 2.27365 |
| 1426941_at   | mucin 15                                                                         | Muc15                      | 2.44E-05  | 2.27574 |
| 1435640_x_at | RIKEN cDNA A130040M12 gene                                                       | A130040M12Rik              | 0.0156627 | 2.27804 |
| 1418909_at   | erythroblast membrane-associated protein                                         | Ermap                      | 0.000794  | 2.28053 |
| 1458599_at   | ---                                                                              | ---                        | 6.31E-07  | 2.28446 |
| 1421865_at   | diazepam binding inhibitor-like 5                                                | Dbil5                      | 6.21E-06  | 2.28633 |
| 1438922_x_at | solute carrier family 25 (mitochondrial carrier, adenine nucleotide translocator | LOC383528 /// LOC630624 // | 0.018642  | 2.28784 |
| 1418191_at   | ubiquitin specific peptidase 18 /// similar to ubiquitin specific protease UBP43 | LOC100048346 /// Usp18     | 6.27E-05  | 2.28814 |
| 1429574_at   | chloride intracellular channel 3                                                 | Clc3                       | 0.0001138 | 2.29014 |
| 1424092_at   | erythrocyte protein band 4.1                                                     | Epb4.1                     | 1.53E-05  | 2.29083 |
| 1449500_at   | serine (or cysteine) peptidase inhibitor, clade B, member 7                      | Serpnb7                    | 8.27E-08  | 2.29324 |
| 1426598_at   | ubiquitously transcribed tetratricopeptide repeat gene, Y chromosome             | Uty                        | 0.0029235 | 2.29799 |
| 1418626_a_at | clusterin                                                                        | Clu                        | 4.71E-05  | 2.30403 |
| 1459921_at   | neurexophilin 1                                                                  | Nxph1                      | 0.0003027 | 2.3088  |
| 1443100_at   | Transcribed locus                                                                | ---                        | 5.95E-05  | 2.30983 |
| 1437689_x_at | clusterin                                                                        | Clu                        | 8.55E-05  | 2.31018 |
| 1451828_a_at | acyl-CoA synthetase long-chain family member 4                                   | Acsl4                      | 0.0009362 | 2.31311 |
| 1417588_at   | UDP-N-acetyl-alpha-D-galactosamine:polypeptide N-acetylgalactosaminyltransferase | Galnt3                     | 0.0018773 | 2.31352 |
| 1433559_at   | solute carrier family 45, member 4                                               | Slc45a4                    | 3.61E-05  | 2.31439 |
| 1451261_s_at | signal transducing adaptor family member 2                                       | Stap2                      | 7.02E-05  | 2.31519 |
| 1420537_at   | potassium channel tetramerisation domain containing 4                            | Kctd4                      | 0.002582  | 2.31586 |
| 1424263_at   | RIKEN cDNA 2810003C17 gene                                                       | 2810003C17Rik              | 0.0001635 | 2.31785 |
| 1432216_s_at | membrane protein, palmitoylated 7 (MAGUK p55 subfamily member 7)                 | Mpp7                       | 0.0003118 | 2.31848 |
| 1425108_a_at | cDNA sequence BC004728                                                           | BC004728                   | 3.33E-05  | 2.32091 |
| 1436764_at   | par-3 (partitioning defective 3) homolog (C. elegans)                            | Pard3                      | 6.96E-05  | 2.32107 |
| 1417408_at   | coagulation factor III                                                           | F3                         | 0.0008843 | 2.3238  |
| 1418901_at   | CCAAT/enhancer binding protein (C/EBP), beta                                     | Cebpb                      | 1.65E-05  | 2.32423 |
| 1431267_at   | RIKEN cDNA 5430425J12 gene                                                       | 5430425J12Rik              | 0.0001355 | 2.32534 |
| 1436345_at   | RIKEN cDNA 5730559C18 gene                                                       | 5730559C18Rik              | 3.90E-06  | 2.3256  |
| 1433579_at   | transmembrane protein 30B                                                        | Tmem30b                    | 0.0003533 | 2.32669 |
| 1434091_at   | fatty acid amide hydrolase                                                       | Faah                       | 0.0001311 | 2.32824 |
| 1417600_at   | solute carrier family 15 (H+/peptide transporter), member 2                      | Slc15a2                    | 0.0009093 | 2.32875 |
| 1457550_at   | RIKEN cDNA 9530059O14 gene                                                       | 9530059O14Rik              | 0.0001127 | 2.32958 |

|              |                                                                                  |                 |           |         |
|--------------|----------------------------------------------------------------------------------|-----------------|-----------|---------|
| 1439620_at   | carbonic anhydrase 13                                                            | Car13           | 0.0030938 | 2.33035 |
| 1429460_at   | G protein-coupled receptor 115                                                   | Gpr115          | 6.76E-05  | 2.33094 |
| 1451287_s_at | RIKEN cDNA 2810003C17 gene                                                       | 2810003C17Rik   | 0.0007927 | 2.33138 |
| 1418401_a_at | dual specificity phosphatase 16                                                  | Dusp16          | 7.35E-05  | 2.33181 |
| 1430879_at   | RIKEN cDNA C030008P14 gene                                                       | C030008P14Rik   | 9.08E-06  | 2.33299 |
| 1456244_x_at | glutaredoxin 3                                                                   | Glrx3           | 0.044828  | 2.33541 |
| 1430513_at   | RIKEN cDNA 1700055N04 gene                                                       | 1700055N04Rik   | 0.002063  | 2.33814 |
| 1430136_at   | glutamate receptor, metabotropic 3                                               | Grm3            | 0.0002042 | 2.34141 |
| 1451461_a_at | aldolase 3, C isoform                                                            | Aldoc           | 6.54E-05  | 2.34287 |
| 1449519_at   | growth arrest and DNA-damage-inducible 45 alpha                                  | Gadd45a         | 0.0055333 | 2.34346 |
| 1437085_at   | RIKEN cDNA D630039A03 gene                                                       | D630039A03Rik   | 0.0001668 | 2.34389 |
| 1430569_at   | tetratricopeptide repeat domain 9C                                               | Ttc9c           | 0.0212276 | 2.34512 |
| 1424463_at   | RIKEN cDNA 2210010L05 gene                                                       | 2210010L05Rik   | 1.75E-05  | 2.34583 |
| 1422677_at   | diacylglycerol O-acyltransferase 2                                               | Dgat2           | 0.0001973 | 2.34608 |
| 1436327_a_at | vacuolar protein sorting 53 (yeast)                                              | Vps53           | 0.0007021 | 2.3481  |
| 1448926_at   | homeo box A5                                                                     | Hoxa5           | 0.0001596 | 2.3488  |
| 1419595_a_at | gamma-glutamyl hydrolase                                                         | Ggh             | 1.35E-05  | 2.3489  |
| 1447914_x_at | RIKEN cDNA 2600010E01 gene                                                       | 2600010E01Rik   | 0.0046343 | 2.35187 |
| 1438408_at   | ankyrin repeat domain 56                                                         | Ankrd56         | 0.0018834 | 2.35311 |
| 1427127_x_at | heat shock protein 1B                                                            | Hspa1b          | 0.0021474 | 2.35359 |
| 1427126_at   | heat shock protein 1B                                                            | Hspa1b          | 0.0001085 | 2.35363 |
| 1452388_at   | heat shock protein 1A                                                            | Hspa1a          | 2.87E-05  | 2.35636 |
| 1441851_x_at | lymphocyte antigen 6 complex, locus G6C                                          | Ly6g6c          | 0.0007703 | 2.35695 |
| 1425737_at   | RIKEN cDNA 2510016G02 gene                                                       | 2510016G02Rik   | 0.0008181 | 2.35953 |
| 1451626_x_at | ---                                                                              | ---             | 0.0058351 | 2.36044 |
| 1421370_a_at | interleukin 1 family, member 5 (delta)                                           | Il1f5           | 2.50E-05  | 2.36247 |
| 1448150_at   | nucleoporin 62                                                                   | Nup62           | 0.0003018 | 2.36273 |
| 1430357_at   | H3 histone, family 3B                                                            | H3f3b           | 0.0002403 | 2.36334 |
| 1438157_s_at | nuclear factor of kappa light polypeptide gene enhancer in B-cells inhibitor, al | Nfkbia          | 0.0022675 | 2.36484 |
| 1421969_a_at | fatty acid amide hydrolase                                                       | Faah            | 3.08E-05  | 2.36528 |
| 1423839_a_at | basic transcription factor 3                                                     | Btf3            | 0.0489076 | 2.36536 |
| 1448939_at   | ubiquitin specific peptidase 25                                                  | Usp25           | 0.0011597 | 2.36803 |
| 1449959_x_at | late cornified envelope 1H                                                       | Lce1h           | 1.94E-06  | 2.36838 |
| 1448865_at   | hydroxysteroid (17-beta) dehydrogenase 7                                         | Hsd17b7         | 2.24E-05  | 2.36878 |
| 1421145_at   | solute carrier family 26 (sulfate transporter), member 2                         | Slc26a2         | 0.000434  | 2.37046 |
| 1424966_at   | transmembrane protein 40                                                         | Tmem40          | 1.91E-05  | 2.37175 |
| 1449902_at   | late cornified envelope 1G /// late cornified envelope 1C                        | Lce1c /// Lce1g | 2.01E-05  | 2.37629 |
| 1441971_at   | Transcribed locus                                                                | ---             | 1.02E-05  | 2.37903 |
| 1448489_at   | platelet-activating factor acetylhydrolase 2                                     | Pafah2          | 4.58E-05  | 2.37957 |
| 1443755_at   | Transcribed locus, weakly similar to NP_001041350.1 arylsulfatase E [Rattus norv | ---             | 0.0007333 | 2.38006 |
| 1441205_at   | RIKEN cDNA 1700055N04 gene                                                       | 1700055N04Rik   | 0.0002758 | 2.38105 |
| 1421075_s_at | cytochrome P450, family 7, subfamily b, polypeptide 1                            | Cyp7b1          | 1.33E-05  | 2.38167 |
| 1439186_at   | RIKEN cDNA E130319B15 gene                                                       | E130319B15Rik   | 0.0039825 | 2.38356 |
| 1441811_x_at | transmembrane protein 176A                                                       | Tmem176a        | 5.31E-05  | 2.38442 |
| 1436820_at   | potassium channel tetramerisation domain containing 11                           | Kctd11          | 1.58E-05  | 2.38592 |

|              |                                                                                  |                       |           |         |
|--------------|----------------------------------------------------------------------------------|-----------------------|-----------|---------|
| 1455324_at   | phosphatidylinositol-specific phospholipase C, X domain containing 2             | Plcxd2                | 4.27E-05  | 2.38866 |
| 1449621_s_at | thrombospondin, type I, domain 1                                                 | Thsd1                 | 1.06E-05  | 2.38908 |
| 1443122_at   | Transcribed locus, strongly similar to NP_034020.1 cholesterol 25-hydroxylase [M | ---                   | 0.0006312 | 2.38953 |
| 1425675_s_at | CEA-related cell adhesion molecule 1                                             | Ceacam1               | 2.52E-05  | 2.38965 |
| 1449271_a_at | heme binding protein 2                                                           | Hebp2                 | 0.0001678 | 2.39459 |
| 1420816_at   | tyrosine 3-monooxygenase/tryptophan 5-monooxygenase activation protein, gamma po | Ywhag                 | 0.0004316 | 2.39537 |
| 1460740_at   | clathrin, light polypeptide (Lcb) /// similar to Cltb protein                    | Cltb /// LOC100046457 | 3.48E-06  | 2.39618 |
| 1439528_at   | RIKEN cDNA 4833423E24 gene                                                       | 4833423E24Rik         | 4.87E-06  | 2.39761 |
| 1437225_x_at | guanine nucleotide binding protein (G protein), alpha inhibiting 3               | Gnai3                 | 0.022659  | 2.39963 |
| 1447749_at   | SET and MYND domain containing 5                                                 | Smyd5                 | 0.0256702 | 2.40157 |
| 1417123_at   | vav 3 oncogene                                                                   | Vav3                  | 5.81E-05  | 2.40382 |
| 1433531_at   | acyl-CoA synthetase long-chain family member 4                                   | Acsl4                 | 0.001091  | 2.40484 |
| 1451927_a_at | mitogen-activated protein kinase 14                                              | Mapk14                | 0.000591  | 2.40555 |
| 1424525_at   | gastrin releasing peptide                                                        | Grp                   | 0.000153  | 2.40967 |
| 1436390_a_at | chloride channel CLIC-like 1                                                     | Clcc1                 | 0.0111125 | 2.40973 |
| 1450460_at   | aquaporin 3                                                                      | Aqp3                  | 3.91E-05  | 2.41027 |
| 1425603_at   | transmembrane protein 176A                                                       | Tmem176a              | 3.02E-05  | 2.41043 |
| 1452298_a_at | myosin Vb                                                                        | Myo5b                 | 2.31E-05  | 2.41103 |
| 1417896_at   | tight junction protein 3                                                         | Tjp3                  | 0.00028   | 2.41247 |
| 1423936_at   | potassium channel tetramerisation domain containing 5                            | Kctd5                 | 4.87E-05  | 2.41284 |
| 1417750_a_at | solute carrier family 25, member 37                                              | Slc25a37              | 2.85E-07  | 2.41523 |
| 1436321_at   | UDP-GlcNAc:betaGal beta-1,3-N-acetylglucosaminyltransferase 7                    | B3gnt7                | 9.27E-05  | 2.41671 |
| 1436077_a_at | FCH domain only 1                                                                | Fcho1                 | 1.18E-05  | 2.4181  |
| 1434895_s_at | protein phosphatase 1, regulatory (inhibitor) subunit 13B                        | Ppp1r13b              | 0.0001043 | 2.41898 |
| 1437062_s_at | phytanoyl-CoA hydroxylase interacting protein-like                               | Phyhipl               | 4.44E-05  | 2.42335 |
| 1456114_at   | CDP-diacylglycerol synthase 1                                                    | Cds1                  | 9.60E-06  | 2.42665 |
| 1434301_at   | RIKEN cDNA D330050I23 gene                                                       | D330050I23Rik         | 1.03E-05  | 2.42951 |
| 1435980_x_at | wingless-related MMTV integration site 6                                         | Wnt6                  | 0.0012976 | 2.43051 |
| 1451712_at   | RIKEN cDNA 8030411F24 gene                                                       | 8030411F24Rik         | 0.0001797 | 2.4319  |
| 1452077_at   | DEAD (Asp-Glu-Ala-Asp) box polypeptide 3, Y-linked                               | Ddx3y                 | 0.0048151 | 2.43233 |
| 1419647_a_at | immediate early response 3                                                       | Ier3                  | 1.88E-06  | 2.4364  |
| 1425447_at   | dickkopf homolog 4 (Xenopus laevis)                                              | Dkk4                  | 0.0006125 | 2.43949 |
| 1450205_at   | fibroblast growth factor 22                                                      | Fgf22                 | 4.52E-05  | 2.44314 |
| 1434229_a_at | polymerase (DNA directed), beta                                                  | Polb                  | 0.0007684 | 2.44422 |
| 1420013_s_at | lanosterol synthase                                                              | Lss                   | 8.25E-05  | 2.44521 |
| 1422664_at   | RAB10, member RAS oncogene family                                                | Rab10                 | 0.000931  | 2.45416 |
| 1417700_at   | Rab38, member of RAS oncogene family                                             | Rab38                 | 1.04E-06  | 2.45549 |
| 1435105_at   | ring finger protein 208                                                          | Rnf208                | 0.0001349 | 2.45703 |
| 1427477_at   | transmembrane protease, serine 13                                                | Tmprss13              | 4.06E-06  | 2.45738 |
| 1450789_at   | rhophilin, Rho GTPase binding protein 1                                          | Rhpn1                 | 8.85E-05  | 2.46158 |
| 1451258_at   | prostate stem cell antigen                                                       | Pzca                  | 8.53E-06  | 2.46373 |
| 1439971_at   | RIKEN cDNA 6330439K17 gene                                                       | 6330439K17Rik         | 0.0007512 | 2.46578 |
| 1448754_at   | retinol binding protein 1, cellular /// similar to cellular retinol binding prot | LOC100045055 /// Rbp1 | 0.0002603 | 2.47166 |
| 1447754_x_at | THAP domain containing 4                                                         | Thap4                 | 0.0015118 | 2.47994 |
| 1450014_at   | claudin 1                                                                        | Cldn1                 | 0.0002187 | 2.48252 |

|              |                                                                                  |                               |           |         |
|--------------|----------------------------------------------------------------------------------|-------------------------------|-----------|---------|
| 1422905_s_at | flavin containing monooxygenase 2                                                | Fmo2                          | 7.78E-06  | 2.4831  |
| 1437172_x_at | hydroxyacyl-Coenzyme A dehydrogenase/3-ketoacyl-Coenzyme A thiolase/enoyl-Coenzy | Hadhb                         | 0.0373606 | 2.48321 |
| 1437145_s_at | RIKEN cDNA 2310002J15 gene                                                       | 2310002J15Rik                 | 0.0002608 | 2.48341 |
| 1451690_a_at | poliovirus receptor-related 4                                                    | Pvrl4                         | 8.52E-05  | 2.48377 |
| 1425027_s_at | SFT2 domain containing 2                                                         | Sft2d2                        | 9.81E-06  | 2.48417 |
| 1457632_s_at | Meis homeobox 2                                                                  | Meis2                         | 0.00019   | 2.48848 |
| 1449449_at   | prostaglandin E synthase                                                         | Ptges                         | 7.54E-05  | 2.48865 |
| 1422997_s_at | acyl-CoA thioesterase 1 /// acyl-CoA thioesterase 2 /// similar to acyl-CoA thio | Acot1 /// Acot2 /// LOC100044 | 1.28E-05  | 2.48903 |
| 1429833_at   | lymphocyte antigen 6 complex, locus G6E                                          | Ly6g6e                        | 5.63E-06  | 2.49046 |
| 1420521_at   | papilin, proteoglycan-like sulfated glycoprotein                                 | Papln                         | 1.73E-05  | 2.49101 |
| 1451440_at   | chondrolectin                                                                    | Chodl                         | 0.0003579 | 2.49207 |
| 1437932_a_at | claudin 1                                                                        | Cldn1                         | 0.0002855 | 2.49248 |
| 1425521_at   | polyadenylate binding protein-interacting protein 1                              | Paip1                         | 0.0082225 | 2.49357 |
| 1448952_at   | RIKEN cDNA A030009H04 gene                                                       | A030009H04Rik                 | 1.06E-06  | 2.49418 |
| 1415993_at   | squalene epoxidase                                                               | Sqle                          | 2.92E-05  | 2.4947  |
| 1433560_at   | solute carrier family 45, member 4                                               | Slc45a4                       | 8.94E-05  | 2.4964  |
| 1460682_s_at | CEA-related cell adhesion molecule 1 /// CEA-related cell adhesion molecule 2    | Ceacam1 /// Ceacam2           | 4.47E-06  | 2.49829 |
| 1453004_at   | solute carrier family 22, member 23                                              | Slc22a23                      | 0.0002423 | 2.49852 |
| 1429452_x_at | RIKEN cDNA 4933439C20 gene                                                       | 4933439C20Rik                 | 0.0006076 | 2.50177 |
| 1434477_at   | headcase homolog (Drosophila)                                                    | Heca                          | 2.13E-05  | 2.50442 |
| 1441860_x_at | Insulin degrading enzyme                                                         | Ide                           | 0.0029066 | 2.50473 |
| 1449367_at   | three prime repair exonuclease 2                                                 | Trex2                         | 0.0001161 | 2.50644 |
| 1441197_at   | RIKEN cDNA 9530059O14 gene                                                       | 9530059O14Rik                 | 3.41E-05  | 2.50794 |
| 1459992_x_at | ceroid-lipofuscinosis, neuronal 8                                                | Cln8                          | 0.0001318 | 2.5102  |
| 1427630_x_at | CEA-related cell adhesion molecule 1                                             | Ceacam1                       | 0.0002331 | 2.51023 |
| 1420249_s_at | chemokine (C-C motif) ligand 6                                                   | Ccl6                          | 1.78E-06  | 2.51076 |
| 1419486_at   | forkhead box C1                                                                  | Foxc1                         | 0.0006298 | 2.51124 |
| 1419052_at   | OVO homolog-like 1 (Drosophila)                                                  | Ovol1                         | 3.24E-05  | 2.51319 |
| 1434092_at   | ATG9 autophagy related 9 homolog B (S. cerevisiae)                               | Atg9b                         | 2.31E-06  | 2.51881 |
| 1436078_at   | FCH domain only 1                                                                | Fcho1                         | 3.51E-05  | 2.52352 |
| 1435462_at   | phosphatidylinositol-specific phospholipase C, X domain containing 2             | Plcxd2                        | 7.77E-07  | 2.53141 |
| 1437469_at   | zinc finger protein 750                                                          | Zfp750                        | 3.27E-05  | 2.53277 |
| 1423284_at   | MANSC domain containing 1                                                        | Mansc1                        | 0.0001485 | 2.53306 |
| 1458347_s_at | transmembrane protease, serine 2                                                 | Tmprss2                       | 0.0005445 | 2.53798 |
| 1447186_at   | solute carrier family 6, member 16                                               | Slc6a16                       | 5.02E-05  | 2.53828 |
| 1420332_x_at | late cornified envelope 1D                                                       | Lce1d                         | 7.67E-05  | 2.53944 |
| 1417222_a_at | transmembrane protein 123                                                        | Tmem123                       | 0.0281259 | 2.54074 |
| 1421325_at   | phospholipase A2, group IIE /// phospholipase A2, group IIF                      | Pla2g2e /// Pla2g2f           | 6.44E-06  | 2.54227 |
| 1423707_at   | transmembrane protein 50B                                                        | Tmem50b                       | 5.96E-06  | 2.54245 |
| 1423142_a_at | GTP binding protein 4                                                            | Gtppb4                        | 0.003944  | 2.54294 |
| 1427844_a_at | CCAAT/enhancer binding protein (C/EBP), beta                                     | Cebpb                         | 4.07E-05  | 2.54477 |
| 1419722_at   | kallikrein related-peptidase 8                                                   | Klk8                          | 5.83E-05  | 2.5479  |
| 1455009_at   | carboxypeptidase D                                                               | Cpd                           | 0.0001166 | 2.54842 |
| 1448390_a_at | dehydrogenase/reductase (SDR family) member 3                                    | Dhrs3                         | 2.78E-07  | 2.54878 |
| 1426634_at   | solute carrier family 5 (sodium/glucose cotransporter), member 9                 | Slc5a9                        | 3.92E-06  | 2.55152 |

|              |                                                                                  |                          |           |         |
|--------------|----------------------------------------------------------------------------------|--------------------------|-----------|---------|
| 1447174_at   | Transcribed locus                                                                | ---                      | 0.0008012 | 2.55454 |
| 1450850_at   | ezrin /// hypothetical protein LOC100044177                                      | Ezr /// LOC100044177     | 1.60E-06  | 2.5549  |
| 1435076_at   | RIKEN cDNA 2310047D13 gene                                                       | 2310047D13Rik            | 9.70E-06  | 2.55764 |
| 1422533_at   | cytochrome P450, family 51                                                       | Cyp51                    | 1.48E-05  | 2.56737 |
| 1423295_at   | transmembrane 9 superfamily member 2                                             | Tm9sf2                   | 0.0372068 | 2.56816 |
| 1426959_at   | 3-hydroxybutyrate dehydrogenase, type 1                                          | Bdh1                     | 3.26E-05  | 2.5707  |
| 1428701_at   | poliovirus receptor-related 4                                                    | Pvrl4                    | 0.0001672 | 2.57313 |
| 1415947_at   | pappalysin 2 /// cellular repressor of E1A-stimulated genes 1                    | Creg1 /// Pappa2         | 5.60E-05  | 2.57319 |
| 1440147_at   | leucine-rich repeat LGI family, member 2                                         | Lgi2                     | 0.0007698 | 2.57971 |
| 1423725_at   | plastin 3 (T-isoform)                                                            | Pls3                     | 0.004813  | 2.58058 |
| 1455908_a_at | serine carboxypeptidase 1                                                        | Scpep1                   | 0.0022511 | 2.58607 |
| 1442923_at   | PTK6 protein tyrosine kinase 6                                                   | Ptk6                     | 0.000129  | 2.58899 |
| 1418100_at   | RIKEN cDNA A030009H04 gene                                                       | A030009H04Rik            | 3.72E-05  | 2.59654 |
| 1418517_at   | Iroquois related homeobox 3 (Drosophila)                                         | Irx3                     | 1.09E-06  | 2.59703 |
| 1425088_at   | sodium channel, nonvoltage-gated, type I, alpha                                  | Scnn1a                   | 2.57E-05  | 2.5991  |
| 1422904_at   | flavin containing monooxygenase 2                                                | Fmo2                     | 5.66E-05  | 2.60014 |
| 1423078_a_at | sterol-C4-methyl oxidase-like                                                    | Sc4mol                   | 3.56E-05  | 2.6013  |
| 1438558_x_at | forkhead box Q1                                                                  | Foxq1                    | 0.0003471 | 2.60702 |
| 1451236_at   | RAS-like, estrogen-regulated, growth-inhibitor                                   | Rerg                     | 0.0001562 | 2.60906 |
| 1448459_at   | Kv channel-interacting protein 1                                                 | Kcnp1                    | 2.53E-05  | 2.61687 |
| 1454632_at   | RIKEN cDNA 6330442E10 gene                                                       | 6330442E10Rik            | 0.0002809 | 2.61808 |
| 1449901_a_at | mitogen-activated protein kinase kinase kinase 6                                 | Map3k6                   | 8.15E-05  | 2.61878 |
| 1437874_s_at | hexosaminidase B                                                                 | Hexb                     | 0.0014844 | 2.62017 |
| 1417047_at   | prominin 2                                                                       | Prom2                    | 0.0001126 | 2.62322 |
| 1419032_at   | RIKEN cDNA 2610018G03 gene                                                       | 2610018G03Rik            | 1.83E-05  | 2.62373 |
| 1416236_a_at | myelin protein zero-like 2                                                       | Mpzl2                    | 0.0001428 | 2.62483 |
| 1451776_s_at | HOP homeobox                                                                     | Hopx                     | 2.12E-05  | 2.62646 |
| 1452385_at   | ubiquitin specific peptidase 53                                                  | Usp53                    | 0.0031617 | 2.632   |
| 1429154_at   | solute carrier family 35, member F2 /// similar to Solute carrier family 35, mem | LOC100048307 /// Slc35f2 | 0.0002105 | 2.63499 |
| 1458871_at   | transmembrane protease, serine 11e                                               | Tmprss11e                | 0.0002284 | 2.64468 |
| 1453218_at   | late cornified envelope 1C                                                       | Lce1c                    | 0.0078349 | 2.64497 |
| 1421835_at   | microtubule-associated protein 7                                                 | Mtap7                    | 3.91E-05  | 2.64536 |
| 1440890_a_at | zinc finger protein 809                                                          | Zfp809                   | 2.10E-05  | 2.64576 |
| 1417968_a_at | methyl-CpG binding domain protein 1                                              | Mbd1                     | 1.73E-05  | 2.64799 |
| 1451050_at   | 5'-nucleotidase, cytosolic III                                                   | Nt5c3                    | 4.56E-06  | 2.64906 |
| 1430837_a_at | methyl-CpG binding domain protein 1                                              | Mbd1                     | 0.0003131 | 2.65002 |
| 1450646_at   | cytochrome P450, family 51                                                       | Cyp51                    | 5.99E-06  | 2.65066 |
| 1454787_at   | zinc finger, DHHC domain containing 9                                            | Zdhhc9                   | 1.61E-05  | 2.65086 |
| 1455694_at   | neurobeachin-like 2                                                              | Nbeal2                   | 5.55E-05  | 2.66022 |
| 1448756_at   | S100 calcium binding protein A9 (calgranulin B)                                  | S100a9                   | 0.0001658 | 2.66413 |
| 1444254_at   | tensin 4                                                                         | Tns4                     | 3.33E-05  | 2.66625 |
| 1436718_at   | neurexophilin 1                                                                  | Nxph1                    | 0.0134452 | 2.66842 |
| 1434599_a_at | tight junction protein 2                                                         | Tjp2                     | 0.0018842 | 2.67465 |
| 1422666_at   | Casitas B-lineage lymphoma c                                                     | Cblc                     | 2.60E-05  | 2.67764 |
| 1449526_a_at | glycerophosphodiester phosphodiesterase domain containing 3                      | Gdpd3                    | 2.52E-05  | 2.68273 |

|              |                                                                                  |                            |           |         |
|--------------|----------------------------------------------------------------------------------|----------------------------|-----------|---------|
| 1420677_x_at | late cornified envelope 1A1                                                      | Lce1a1                     | 0.0001829 | 2.68633 |
| 1419485_at   | forkhead box C1                                                                  | Foxc1                      | 0.0005884 | 2.68857 |
| 1428804_at   | microfibrillar-associated protein 3-like                                         | Mfap3l                     | 0.0003112 | 2.69245 |
| 1435033_at   | Rho guanine nucleotide exchange factor (GEF) 4                                   | Arhgef4                    | 7.82E-05  | 2.69396 |
| 1425264_s_at | myelin basic protein                                                             | Mbp                        | 1.34E-08  | 2.69438 |
| 1428957_at   | transmembrane protein 177                                                        | Tmem177                    | 9.53E-05  | 2.69756 |
| 1424148_a_at | signal transducing adaptor family member 2                                       | Stap2                      | 6.24E-05  | 2.69978 |
| 1452932_at   | zinc finger and BTB domain containing 7a                                         | Zbtb7a                     | 0.0019487 | 2.70095 |
| 1454658_at   | ilvB (bacterial acetolactate synthase)-like                                      | Ilvbl                      | 6.98E-06  | 2.70192 |
| 1418648_at   | EGL nine homolog 3 (C. elegans)                                                  | Egln3                      | 0.0001062 | 2.70481 |
| 1450015_x_at | sphingosine-1-phosphate phosphatase 1                                            | Sgpp1                      | 5.72E-05  | 2.70592 |
| 1435155_at   | cingulin                                                                         | Cgn                        | 6.16E-05  | 2.70769 |
| 1426438_at   | DEAD (Asp-Glu-Ala-Asp) box polypeptide 3, Y-linked                               | Ddx3y                      | 0.0083327 | 2.71403 |
| 1440779_s_at | solute carrier family 5 (sodium/glucose cotransporter), member 9                 | Slc5a9                     | 0.0001206 | 2.7159  |
| 1425321_a_at | calmin                                                                           | Clmn                       | 1.86E-05  | 2.72807 |
| 1434237_at   | uroplakin 3B                                                                     | Upk3b                      | 5.86E-05  | 2.73669 |
| 1451320_at   | RIKEN cDNA 3110043J09 gene                                                       | 3110043J09Rik              | 0.0005214 | 2.74141 |
| 1422573_at   | AMP deaminase 3                                                                  | Ampd3                      | 8.45E-06  | 2.74201 |
| 1425764_a_at | branched chain aminotransferase 2, mitochondrial                                 | Bcat2                      | 0.0003634 | 2.7498  |
| 1425418_at   | WAP four-disulfide core domain 5                                                 | Wfdc5                      | 2.98E-05  | 2.75112 |
| 1424306_at   | elongation of very long chain fatty acids (FEN1/Elo2, SUR4/Elo3, yeast)-like 4   | Elov4                      | 0.000185  | 2.75312 |
| 1452017_at   | SRY-box containing gene 15                                                       | Sox15                      | 0.0011234 | 2.75618 |
| 1417122_at   | vav 3 oncogene                                                                   | Vav3                       | 0.0003151 | 2.76409 |
| 1444507_at   | ubiquitin specific peptidase 53                                                  | Usp53                      | 0.0001036 | 2.76779 |
| 1453590_at   | ADP-ribosylation factor-like 5B                                                  | Arl5b                      | 0.000301  | 2.76782 |
| 1417797_a_at | RIKEN cDNA 1810019J16 gene                                                       | 1810019J16Rik              | 0.0103444 | 2.77067 |
| 1419033_at   | RIKEN cDNA 2610018G03 gene                                                       | 2610018G03Rik              | 5.84E-06  | 2.77162 |
| 1421524_at   | cripto, FRL-1, cryptic family 1                                                  | Cfc1                       | 1.68E-05  | 2.77198 |
| 1445181_at   | echinoderm microtubule associated protein like 5                                 | Eml5                       | 5.17E-05  | 2.77239 |
| 1427261_at   | WW, C2 and coiled-coil domain containing 1                                       | Wwc1                       | 1.13E-05  | 2.78149 |
| 1416674_at   | protein tyrosine phosphatase, receptor type, U                                   | Ptpru                      | 1.47E-05  | 2.78263 |
| 1443882_at   | Transcribed locus                                                                | ---                        | 1.32E-06  | 2.79348 |
| 1425073_at   | pleckstrin homology domain containing, family G (with RhoGef domain) member 6    | Plekhg6                    | 5.36E-07  | 2.79588 |
| 1448158_at   | syndecan 1                                                                       | Sdc1                       | 9.32E-05  | 2.80043 |
| 1427195_at   | Mus musculus, clone IMAGE:3983419, mRNA                                          | ---                        | 2.60E-05  | 2.80305 |
| 1422749_at   | lymphocyte antigen 6 complex, locus G6C                                          | Ly6g6c                     | 3.60E-06  | 2.80308 |
| 1448110_at   | sema domain, immunoglobulin domain (Ig), transmembrane domain (TM) and short cyt | Sema4a                     | 3.22E-05  | 2.8054  |
| 1438360_x_at | solute carrier family 25 (mitochondrial carrier, adenine nucleotide translocator | LOC383528 /// LOC630624 // | 0.02283   | 2.81339 |
| 1443997_at   | G protein regulated inducer of neurite outgrowth 2                               | Gprn2                      | 1.72E-05  | 2.81681 |
| 1427019_at   | protein tyrosine phosphatase, receptor type Z, polypeptide 1                     | Ptprz1                     | 8.96E-06  | 2.82781 |
| 1448326_a_at | cellular retinoic acid binding protein I                                         | Crabp1                     | 5.10E-05  | 2.83113 |
| 1433930_at   | heparanase                                                                       | Hpse                       | 7.18E-06  | 2.83441 |
| 1449065_at   | acyl-CoA thioesterase 1 /// similar to acyl-CoA thioesterase                     | Acot1 /// LOC100044830     | 6.26E-05  | 2.83727 |
| 1451457_at   | sterol-C5-desaturase (fungal ERG3, delta-5-desaturase) homolog (S. cerevisiae)   | Sc5d                       | 0.0001021 | 2.8406  |
| 1455691_at   | cytochrome P450, family 21, subfamily a, polypeptide 1                           | Cyp21a1                    | 4.04E-05  | 2.8417  |

|              |                                                                                  |                         |           |         |
|--------------|----------------------------------------------------------------------------------|-------------------------|-----------|---------|
| 1456888_at   | 6-phosphofructo-2-kinase/fructose-2,6-biphosphatase 4                            | Pfkfb4                  | 9.63E-05  | 2.8492  |
| 1438855_x_at | tumor necrosis factor, alpha-induced protein 2                                   | Tnfaip2                 | 0.0016651 | 2.85503 |
| 1418207_at   | FXFD domain-containing ion transport regulator 4                                 | Fxyd4                   | 0.000161  | 2.85672 |
| 1430596_s_at | vestigial like 3 (Drosophila)                                                    | Vgll3                   | 0.0004098 | 2.85844 |
| 1425715_at   | interleukin 1 family, member 8                                                   | Il1f8                   | 0.0001138 | 2.86323 |
| 1422629_s_at | shroom family member 3                                                           | Shroom3                 | 5.25E-05  | 2.87716 |
| 1433453_a_at | ankyrin repeat and BTB (POZ) domain containing 2                                 | Abtb2                   | 0.0017715 | 2.87891 |
| 1417156_at   | keratin 19                                                                       | Krt19                   | 0.0001434 | 2.87942 |
| 1421663_at   | dehydrogenase/reductase member 2                                                 | Dhrs2                   | 0.000166  | 2.88049 |
| 1452834_at   | RIKEN cDNA 2600010E01 gene                                                       | 2600010E01Rik           | 1.22E-05  | 2.88925 |
| 1418649_at   | EGL nine homolog 3 (C. elegans)                                                  | Egln3                   | 2.53E-06  | 2.89389 |
| 1456467_s_at | nemo like kinase /// similar to nemo-like kinase                                 | LOC100044468 /// Nik    | 0.0175189 | 2.90023 |
| 1451363_a_at | DENN/MADD domain containing 2D                                                   | Dennd2d                 | 0.0004955 | 2.90035 |
| 1457254_x_at | RIKEN cDNA 6330442E10 gene                                                       | 6330442E10Rik           | 0.0001917 | 2.90104 |
| 1419133_at   | envoplakin                                                                       | Evpl                    | 4.96E-05  | 2.90407 |
| 1428980_at   | keratinocyte expressed, proline-rich                                             | Kprp                    | 3.26E-06  | 2.90697 |
| 1438665_at   | sphingomyelin phosphodiesterase 3, neutral                                       | Smpd3                   | 1.35E-05  | 2.91151 |
| 1449237_at   | arachidonate lipoxygenase 3                                                      | Aloxe3                  | 6.61E-06  | 2.91533 |
| 1416854_at   | solute carrier family 34 (sodium phosphate), member 2                            | Slc34a2                 | 3.21E-07  | 2.9156  |
| 1460042_at   | solute carrier family 23 (nucleobase transporters), member 3                     | Slc23a3                 | 0.000787  | 2.91664 |
| 1428662_a_at | HOP homeobox                                                                     | Hopx                    | 8.29E-06  | 2.91828 |
| 1436614_at   | Transcribed locus                                                                | ---                     | 1.46E-05  | 2.92088 |
| 1418791_at   | SH3-domain GRB2-like 2                                                           | Sh3gl2                  | 7.11E-05  | 2.9239  |
| 1452957_at   | keratin associated protein 3-3 /// keratin associated protein 3-2                | Krtap3-2 /// Krtap3-3   | 0.0004055 | 2.92407 |
| 1434109_at   | SH3 domain binding glutamic acid-rich protein like 2                             | Sh3bgl2                 | 0.0001073 | 2.92569 |
| 1453970_at   | ATP-binding cassette, sub-family A (ABC1), member 12                             | Abca12                  | 3.78E-05  | 2.9276  |
| 1428776_at   | solute carrier family 10 (sodium/bile acid cotransporter family), member 6       | Slc10a6                 | 5.33E-06  | 2.93153 |
| 1421040_a_at | glutathione S-transferase, alpha 2 (Yc2)                                         | Gsta2                   | 4.64E-06  | 2.9326  |
| 1447845_s_at | vanin 1                                                                          | Vnn1                    | 3.83E-05  | 2.93979 |
| 1418601_at   | aldehyde dehydrogenase family 1, subfamily A7                                    | Aldh1a7                 | 1.12E-05  | 2.9413  |
| 1425248_a_at | TYRO3 protein tyrosine kinase 3 /// similar to Rse                               | LOC100048488 /// Tyro3  | 4.91E-05  | 2.94243 |
| 1422222_at   | involucrin                                                                       | Ivl                     | 4.08E-05  | 2.946   |
| 1416785_at   | Kv channel-interacting protein 1                                                 | Kcni1                   | 1.65E-05  | 2.94673 |
| 1420824_at   | sema domain, immunoglobulin domain (Ig), transmembrane domain (TM) and short cyt | Sema4d                  | 3.58E-05  | 2.94929 |
| 1419717_at   | sema domain, immunoglobulin domain (Ig), short basic domain, secreted, (semaphor | LOC100044162 /// Sema3e | 2.57E-05  | 2.95106 |
| 1420771_at   | small proline-rich protein 2D                                                    | Spr2d                   | 5.73E-05  | 2.95849 |
| 1429844_at   | RIKEN cDNA 2310043J07 gene                                                       | 2310043J07Rik           | 0.00017   | 2.95923 |
| 1420822_s_at | sphingosine-1-phosphate phosphatase 1                                            | Sgpp1                   | 0.0018657 | 2.96367 |
| 1448600_s_at | vav 3 oncogene                                                                   | Vav3                    | 0.0007048 | 2.96973 |
| 1421943_at   | transforming growth factor alpha                                                 | Tgfa                    | 9.00E-08  | 2.97362 |
| 1422822_at   | StAR-related lipid transfer (START) domain containing 5                          | Stard5                  | 1.02E-05  | 2.97559 |
| 1423174_a_at | par-6 (partitioning defective 6) homolog beta (C. elegans)                       | Pard6b                  | 0.0001235 | 2.97717 |
| 1442263_at   | regulator of G-protein signaling 13                                              | Rgs13                   | 0.0002318 | 2.97952 |
| 1429909_at   | RIKEN cDNA 2600010E01 gene                                                       | 2600010E01Rik           | 0.0027705 | 2.98194 |
| 1440186_s_at | prosaposin-like 1                                                                | Psap11                  | 0.0011222 | 2.98347 |



|              |                                                                                  |                         |           |         |
|--------------|----------------------------------------------------------------------------------|-------------------------|-----------|---------|
| 1417837_at   | pleckstrin homology-like domain, family A, member 2                              | Phlda2                  | 6.66E-05  | 2.99047 |
| 1437813_at   | absent in melanoma 1-like                                                        | Aim11                   | 3.58E-05  | 2.99147 |
| 1420391_at   | par-3 (partitioning defective 3) homolog (C. elegans)                            | Pard3                   | 0.0001355 | 2.99173 |
| 1439492_at   | serine palmitoyltransferase, long chain base subunit 3                           | Sptlc3                  | 8.25E-06  | 2.99527 |
| 1455477_s_at | PDZK1 interacting protein 1                                                      | Pdzk1ip1                | 2.98E-06  | 3.00037 |
| 1453435_a_at | flavin containing monooxygenase 2                                                | Fmo2                    | 1.47E-05  | 3.00346 |
| 1449074_at   | RIKEN cDNA 1700019N12 gene                                                       | 1700019N12Rik           | 8.32E-05  | 3.00402 |
| 1420413_at   | solute carrier family 7 (cationic amino acid transporter, y+ system), member 11  | Slc7a11                 | 0.0006399 | 3.00494 |
| 1419498_at   | transmembrane and immunoglobulin domain containing 1                             | Tmigd1                  | 2.49E-05  | 3.00716 |
| 1438394_x_at | keratin 4                                                                        | Krt4                    | 0.0005519 | 3.00986 |
| 1420676_at   | late cornified envelope 1A1                                                      | Lce1a1                  | 0.0004166 | 3.01432 |
| 1430724_at   | abhydrolase domain containing 9                                                  | Abhd9                   | 2.59E-05  | 3.0162  |
| 1422779_at   | sphingomyelin phosphodiesterase 3, neutral                                       | Smpd3                   | 0.0002698 | 3.01791 |
| 1456210_at   | RIKEN cDNA 5430407P10 gene                                                       | 5430407P10Rik           | 6.46E-05  | 3.0395  |
| 1448241_at   | GM2 ganglioside activator protein                                                | Gm2a                    | 1.00E-07  | 3.04951 |
| 1437250_at   | melanoregulin                                                                    | Mreg                    | 6.46E-05  | 3.05378 |
| 1419147_at   | REC8 homolog (yeast)                                                             | Rec8                    | 0.0001097 | 3.05984 |
| 1435459_at   | flavin containing monooxygenase 2                                                | Fmo2                    | 4.39E-05  | 3.06198 |
| 1453593_at   | vestigial like 3 (Drosophila)                                                    | Vgll3                   | 0.0002534 | 3.06746 |
| 1424127_at   | eyes absent 2 homolog (Drosophila)                                               | Eya2                    | 0.0002587 | 3.06764 |
| 1434496_at   | polo-like kinase 3 (Drosophila)                                                  | Plk3                    | 3.77E-05  | 3.07422 |
| 1452492_a_at | solute carrier family 37 (glycerol-3-phosphate transporter), member 2            | Slc37a2                 | 7.49E-06  | 3.07676 |
| 1418025_at   | basic helix-loop-helix domain containing, class B2                               | Bhlhb2                  | 3.87E-06  | 3.07904 |
| 1423175_s_at | par-6 (partitioning defective 6) homolog beta (C. elegans)                       | Pard6b                  | 0.0001496 | 3.08094 |
| 1443043_at   | otopetrin 2                                                                      | Otop2                   | 8.47E-05  | 3.08159 |
| 1425837_a_at | CCR4 carbon catabolite repression 4-like (S. cerevisiae) /// similar to carbon c | Ccrn4l /// LOC100047134 | 9.53E-06  | 3.0882  |
| 1419201_at   | kallikrein related-peptidase 11                                                  | Klk11                   | 9.13E-06  | 3.08881 |
| 1424256_at   | retinol dehydrogenase 12                                                         | Rdh12                   | 6.55E-06  | 3.08959 |
| 1428151_x_at | cysteine conjugate-beta lyase 1                                                  | Ccbl1                   | 1.62E-06  | 3.09624 |
| 1449254_at   | secreted phosphoprotein 1                                                        | Spp1                    | 0.000483  | 3.09842 |
| 1451546_s_at | transmembrane protein 40                                                         | Tmem40                  | 5.05E-05  | 3.10057 |
| 1423136_at   | fibroblast growth factor 1                                                       | Fgf1                    | 5.57E-05  | 3.1007  |
| 1424318_at   | RIKEN cDNA 1110067D22 gene                                                       | 1110067D22Rik           | 1.95E-06  | 3.10137 |
| 1424077_at   | glycerophosphodiester phosphodiesterase domain containing 1                      | Gdpd1                   | 4.09E-05  | 3.10275 |
| 1418924_at   | Ras association (RalGDS/AF-6) domain family (N-terminal) member 7                | Rassf7                  | 2.80E-05  | 3.10436 |
| 1417895_a_at | transmembrane protein 54                                                         | Tmem54                  | 4.31E-05  | 3.10525 |
| 1449155_at   | polymerase (RNA) III (DNA directed) polypeptide G                                | Polr3g                  | 2.03E-05  | 3.11006 |
| 1435463_s_at | myosin ID                                                                        | Myo1d                   | 2.31E-05  | 3.11083 |
| 1447361_at   | Transcribed locus, strongly similar to NP_038632.1 metaxin 1 [Mus musculus]      | ---                     | 0.0013014 | 3.11353 |
| 1419135_at   | lymphotoxin B                                                                    | Ltb                     | 7.26E-05  | 3.11865 |
| 1449365_at   | endothelial differentiation, sphingolipid G-protein-coupled receptor, 8          | Edg8                    | 0.0002133 | 3.12309 |
| 1451308_at   | elongation of very long chain fatty acids (FEN1/Elo2, SUR4/Elo3, yeast)-like 4   | Elov14                  | 2.26E-05  | 3.12369 |
| 1418739_at   | serum/glucocorticoid regulated kinase 2                                          | Sgk2                    | 3.79E-05  | 3.13154 |
| 1437279_x_at | syndecan 1                                                                       | Sdc1                    | 0.0007252 | 3.14087 |
| 1438934_x_at | sema domain, immunoglobulin domain (Ig), transmembrane domain (TM) and short cyt | Sema4a                  | 0.0016794 | 3.14154 |

|              |                                                                                  |                         |           |         |
|--------------|----------------------------------------------------------------------------------|-------------------------|-----------|---------|
| 1436155_at   | nicotinamide nucleotide adenylyltransferase 2                                    | Nmnat2                  | 0.0001186 | 3.1428  |
| 1438566_at   | ST8 alpha-N-acetyl-neuraminide alpha-2,8-sialyltransferase 6                     | St8sia6                 | 5.37E-06  | 3.14299 |
| 1420364_at   | G protein-coupled receptor 87                                                    | Gpr87                   | 8.52E-07  | 3.15046 |
| 1431554_a_at | annexin A9                                                                       | Anxa9                   | 2.63E-06  | 3.1583  |
| 1451846_at   | nebulette                                                                        | Nebi                    | 8.61E-05  | 3.15996 |
| 1453599_at   | tripartite motif-containing 71                                                   | Trim71                  | 0.0001271 | 3.1601  |
| 1423120_at   | insulin degrading enzyme                                                         | Ide                     | 8.23E-06  | 3.16542 |
| 1427202_at   | RIKEN cDNA 4833442J19 gene                                                       | 4833442J19Rik           | 3.29E-05  | 3.16829 |
| 1437694_at   | Transcribed locus                                                                | ---                     | 0.0006253 | 3.16842 |
| 1423437_at   | glutathione S-transferase, alpha 3                                               | Gsta3                   | 1.28E-05  | 3.17289 |
| 1457700_at   | cytochrome P450, family 4, subfamily f, polypeptide 39                           | Cyp4f39                 | 2.54E-06  | 3.18012 |
| 1457044_at   | RIKEN cDNA 4732474O15 gene                                                       | 4732474O15Rik           | 0.0002325 | 3.18299 |
| 1431010_a_at | retinol dehydrogenase 12                                                         | Rdh12                   | 0.0001013 | 3.18336 |
| 1439018_at   | FH2 domain containing 1                                                          | Fhdc1                   | 1.06E-05  | 3.18623 |
| 1453607_at   | microfibrillar-associated protein 3-like                                         | Mfap3l                  | 7.32E-05  | 3.18648 |
| 1457026_at   | lipase, member H                                                                 | Liph                    | 2.24E-05  | 3.18805 |
| 1452136_at   | solute carrier family 5 (sodium/glucose cotransporter), member 9                 | Slc5a9                  | 0.0001258 | 3.20186 |
| 1451100_a_at | carnitine deficiency-associated gene expressed in ventricle 3                    | Cdv3                    | 0.0003263 | 3.20236 |
| 1437842_at   | phosphatidylinositol-specific phospholipase C, X domain containing 1             | Plcx1                   | 9.85E-05  | 3.21562 |
| 1455216_at   | progesterin and adipoQ receptor family member VI                                 | Paqr6                   | 5.74E-05  | 3.21678 |
| 1418320_at   | protease, serine, 8 (prostatic)                                                  | Prss8                   | 8.56E-06  | 3.22265 |
| 1419570_at   | solute carrier family 28 (sodium-coupled nucleoside transporter), member 3       | Slc28a3                 | 3.80E-05  | 3.2239  |
| 1423323_at   | tumor-associated calcium signal transducer 2                                     | Tacstd2                 | 3.47E-07  | 3.23116 |
| 1418283_at   | claudin 4                                                                        | Cldn4                   | 2.94E-06  | 3.23615 |
| 1451895_a_at | 24-dehydrocholesterol reductase                                                  | Dhcr24                  | 1.03E-06  | 3.24547 |
| 1422821_s_at | StAR-related lipid transfer (START) domain containing 5                          | Stard5                  | 3.15E-05  | 3.2464  |
| 1453801_at   | thioesterase superfamily member 5                                                | Them5                   | 1.74E-05  | 3.26605 |
| 1417575_at   | OTU domain, ubiquitin aldehyde binding 2                                         | Otub2                   | 3.55E-05  | 3.26888 |
| 1452650_at   | tripartite motif-containing 62                                                   | Trim62                  | 0.0001259 | 3.27017 |
| 1422735_at   | forkhead box Q1                                                                  | Foxq1                   | 0.000149  | 3.27762 |
| 1427673_a_at | sema domain, immunoglobulin domain (Ig), short basic domain, secreted, (semaphor | LOC100044162 /// Sema3e | 8.38E-06  | 3.27796 |
| 1424409_at   | claudin 23                                                                       | Cldn23                  | 5.50E-05  | 3.28915 |
| 1448265_x_at | myelin protein zero-like 2                                                       | Mpzl2                   | 1.73E-05  | 3.29022 |
| 1457915_at   | RIKEN cDNA 4833442J19 gene                                                       | 4833442J19Rik           | 1.04E-05  | 3.29294 |
| 1418304_at   | protocadherin 21                                                                 | Pcdh21                  | 1.40E-05  | 3.30574 |
| 1452284_at   | protein tyrosine phosphatase, receptor type Z, polypeptide 1                     | Ptprz1                  | 2.61E-05  | 3.30983 |
| 1418352_at   | hydroxysteroid (17-beta) dehydrogenase 2                                         | Hsd17b2                 | 5.36E-05  | 3.31729 |
| 1417489_at   | neuropeptide Y receptor Y2                                                       | Npy2r                   | 0.0001459 | 3.31877 |
| 1452517_at   | pleckstrin homology domain containing, family H (with MyTH4 domain) member 1     | Plekhh1                 | 4.64E-05  | 3.32733 |
| 1457936_at   | mitogen-activated protein kinase 8                                               | Mapk8                   | 9.60E-06  | 3.32814 |
| 1434094_at   | transmembrane protein 125                                                        | Tmem125                 | 0.0001885 | 3.33166 |
| 1438452_at   | nebulette                                                                        | Nebi                    | 3.37E-06  | 3.33575 |
| 1425290_at   | syntaxin 19                                                                      | Stx19                   | 1.02E-05  | 3.34948 |
| 1451667_at   | RIKEN cDNA C530043G21 gene                                                       | C530043G21Rik           | 1.30E-05  | 3.35425 |
| 1451613_at   | transformation related protein 63 regulated                                      | Flg /// Hnrr            | 0.0011274 | 3.36036 |

|              |                                                                                  |                              |           |         |
|--------------|----------------------------------------------------------------------------------|------------------------------|-----------|---------|
| 1430114_at   | phosphatidylinositol glycan anchor biosynthesis, class H                         | Tprg                         | 7.88E-06  | 3.36593 |
| 1455860_at   | StAR-related lipid transfer (START) domain containing 5                          | Pigh                         | 3.55E-05  | 3.37338 |
| 1450769_s_at | chemokine (C-C motif) ligand 6                                                   | Stard5                       | 0.000313  | 3.38607 |
| 1417266_at   | isopentenyl-diphosphate delta isomerase                                          | Ccl6                         | 1.71E-06  | 3.38922 |
| 1423804_a_at | glutamate receptor, ionotropic, AMPA2 (alpha 2)                                  | Idi1                         | 0.0013413 | 3.39001 |
| 1421970_a_at | eukaryotic translation initiation factor 2, subunit 3, structural gene Y-linked  | Gria2                        | 6.98E-06  | 3.39104 |
| 1417210_at   | serine (or cysteine) peptidase inhibitor, clade B, member 8                      | Eif2s3y                      | 0.0023763 | 3.39275 |
| 1422776_at   | phosphoserine phosphatase                                                        | Serpnb8                      | 3.59E-06  | 3.40068 |
| 1415673_at   | sciellin                                                                         | Psph                         | 1.84E-07  | 3.40644 |
| 1422837_at   | coiled-coil domain containing 120                                                | Scel                         | 6.40E-06  | 3.40949 |
| 1428066_at   | myelin protein zero-like 3                                                       | Ccdc120                      | 1.26E-05  | 3.41759 |
| 1435571_at   | par-3 (partitioning defective 3) homolog (C. elegans)                            | Mpzl3                        | 4.58E-07  | 3.42101 |
| 1436765_at   | prosaposin-like 1                                                                | Pard3                        | 1.22E-05  | 3.42364 |
| 1429457_at   | EPS8-like 2                                                                      | Psapl1                       | 5.19E-06  | 3.42428 |
| 1417843_s_at | macrophage stimulating 1 (hepatocyte growth factor-like)                         | Eps8l2                       | 2.73E-07  | 3.43833 |
| 1418267_at   | glutathione S-transferase, alpha 1 (Ya) /// glutathione S-transferase, alpha 2 ( | Mst1                         | 1.75E-05  | 3.44701 |
| 1421041_s_at | cysteine conjugate-beta lyase 1                                                  | Gsta1 /// Gsta2 /// LOC10004 | 1.77E-06  | 3.44886 |
| 1452678_a_at | mal, T-cell differentiation protein-like                                         | Ccbl1                        | 0.0008641 | 3.44943 |
| 1435693_at   | serine (or cysteine) peptidase inhibitor, clade A (alpha-1 antiproteinase, antit | Mall                         | 2.85E-06  | 3.45011 |
| 1429285_at   | RIKEN cDNA 4933439C20 gene                                                       | Serpina9                     | 9.05E-05  | 3.45595 |
| 1453144_at   | B-cell linker                                                                    | 4933439C20Rik                | 0.0002205 | 3.47243 |
| 1451780_at   | trans-acting transcription factor 6                                              | Blnk                         | 7.54E-05  | 3.47335 |
| 1427787_at   | sphingosine-1-phosphate phosphatase 1                                            | Sp6                          | 3.89E-06  | 3.47664 |
| 1420821_at   | solute carrier family 7 (cationic amino acid transporter, y+ system), member 11  | Sgpp1                        | 0.0081997 | 3.481   |
| 1443536_at   | serine (or cysteine) peptidase inhibitor, clade B, member 2                      | Slc7a11                      | 6.93E-05  | 3.48224 |
| 1419082_at   | CEA-related cell adhesion molecule 1                                             | Serpnb2                      | 9.55E-05  | 3.48365 |
| 1425538_x_at | cytochrome P450, family 3, subfamily a, polypeptide 13                           | Ceacam1                      | 5.41E-05  | 3.4931  |
| 1419523_at   | syndecan binding protein (syntenin) 2                                            | Cyp3a13                      | 0.0002971 | 3.50406 |
| 1424090_at   | phospholipase A2, group IVD /// similar to cytosolic phospholipase A2 delta      | Sdcbp2                       | 6.71E-05  | 3.51114 |
| 1453405_at   | RIKEN cDNA 2610528J11 gene                                                       | LOC100048636 /// Pla2g4d     | 3.28E-05  | 3.52701 |
| 1450947_at   | occludin                                                                         | 2610528J11Rik                | 4.00E-06  | 3.53049 |
| 1448873_at   | homeo box C5                                                                     | Ocln                         | 3.32E-05  | 3.53194 |
| 1456301_at   | solute carrier family 39 (zinc transporter), member 2                            | Hoxc5                        | 4.34E-06  | 3.5399  |
| 1443163_at   | phospholipase A2, group IVF                                                      | Slc39a2                      | 3.44E-05  | 3.55509 |
| 1455408_at   | Transcribed locus                                                                | Pla2g4f                      | 0.0002217 | 3.55703 |
| 1458699_at   | 3-oxoacid CoA transferase 1                                                      | ---                          | 5.97E-07  | 3.56259 |
| 1436750_a_at | RIKEN cDNA C130092O11 gene                                                       | Oxct1                        | 0.0348414 | 3.5665  |
| 1437306_at   | periplakin                                                                       | C130092O11Rik                | 9.85E-05  | 3.57228 |
| 1460732_a_at | progesterin and adipoQ receptor family member VII                                | Ppl                          | 3.96E-06  | 3.57959 |
| 1460674_at   | regulator of G-protein signalling 9 binding protein                              | Paqr7                        | 1.29E-06  | 3.59725 |
| 1440256_at   | ankyrin repeat domain 22                                                         | Rgs9bp                       | 3.47E-05  | 3.60679 |
| 1453239_a_at | microfibrillar-associated protein 3-like                                         | Ankrd22                      | 1.97E-05  | 3.61588 |
| 1441481_at   | PDZK1 interacting protein 1                                                      | Mfap3l                       | 0.0001228 | 3.62669 |
| 1417689_a_at | coiled-coil domain containing 64B                                                | Pdzk1ip1                     | 5.31E-06  | 3.64266 |
| 1460051_at   | secretory leukocyte peptidase inhibitor                                          | Ccdc64b                      | 4.68E-05  | 3.65451 |

|              |                                                                                  |                        |           |         |
|--------------|----------------------------------------------------------------------------------|------------------------|-----------|---------|
| 1448377_at   | lipase, family member M                                                          | Sipi                   | 7.46E-06  | 3.66074 |
| 1430551_s_at | RIKEN cDNA 2310007D09 gene                                                       | Lipm                   | 0.0007419 | 3.66712 |
| 1452924_at   | oxidative stress induced growth inhibitor 1                                      | 2310007D09Rik          | 5.11E-06  | 3.6688  |
| 1424022_at   | vanin 1                                                                          | Osgin1                 | 8.66E-06  | 3.68253 |
| 1418486_at   | serine peptidase inhibitor, Kazal type 5                                         | Vnn1                   | 0.000225  | 3.68424 |
| 1430567_at   | bactericidal/permeability-increasing protein-like 2                              | Spink5                 | 1.01E-05  | 3.68478 |
| 1437232_at   | solute carrier family 15 (oligopeptide transporter), member 1                    | Bpil2                  | 0.0003107 | 3.69045 |
| 1419343_at   | RIKEN cDNA 9930012K11 gene                                                       | Slc15a1                | 1.91E-06  | 3.70557 |
| 1433801_at   | E74-like factor 3                                                                | 9930012K11Rik          | 2.61E-06  | 3.71156 |
| 1416916_at   | elongation of very long chain fatty acids (FEN1/Elo2, SUR4/Elo3, yeast)-like 1   | Elf3                   | 2.98E-05  | 3.72136 |
| 1443820_x_at | RIKEN cDNA 2200002K05 gene                                                       | Elovl1                 | 0.0018007 | 3.72269 |
| 1428400_at   | repetin                                                                          | 2200002K05Rik          | 3.79E-05  | 3.72491 |
| 1420431_at   | GM2 ganglioside activator protein                                                | Rptn                   | 0.0001284 | 3.72497 |
| 1416188_at   | thioesterase superfamily member 5                                                | Gm2a                   | 2.15E-05  | 3.72541 |
| 1431211_s_at | endonuclease domain containing 1                                                 | Them5                  | 1.48E-05  | 3.72568 |
| 1433796_at   | homeo box C5                                                                     | Endod1                 | 3.75E-05  | 3.72629 |
| 1439885_at   | carbonic anhydrase 8 /// similar to Carbonic anhydrase-related protein (CARP) (C | Hoxc5                  | 1.42E-05  | 3.7345  |
| 1427482_a_at | methyl-CpG binding domain protein 1                                              | Car8 /// LOC676792     | 3.75E-05  | 3.73584 |
| 1430838_x_at | transmembrane protein 62                                                         | Mbd1                   | 3.63E-05  | 3.73681 |
| 1455350_at   | chromatin modifying protein 4C                                                   | Tmem62                 | 3.00E-05  | 3.73924 |
| 1420517_at   | tetratricopeptide repeat domain 22                                               | Chmp4c                 | 0.0007994 | 3.75875 |
| 1457149_at   | solute carrier family 28 (sodium-coupled nucleoside transporter), member 3       | Ttc22                  | 3.71E-06  | 3.78792 |
| 1419571_at   | epsin 3                                                                          | Slc28a3                | 2.13E-05  | 3.7924  |
| 1424960_at   | small proline-rich protein 3                                                     | Epn3                   | 3.32E-05  | 3.79344 |
| 1422401_at   | kallikrein related-peptidase 6                                                   | Spr3                   | 0.0001262 | 3.80276 |
| 1448982_at   | phospholipase A2, group III                                                      | Klk6                   | 0.0001155 | 3.81968 |
| 1456231_at   | molybdenum cofactor sulfurase                                                    | Pla2g3                 | 6.38E-05  | 3.85576 |
| 1429352_at   | solute carrier family 5 (sodium/glucose cotransporter), member 9                 | Mocos                  | 5.98E-06  | 3.86619 |
| 1439494_at   | uroplakin 3B                                                                     | Slc5a9                 | 0.0002292 | 3.87437 |
| 1454881_s_at | 24-dehydrocholesterol reductase                                                  | Upk3b                  | 7.75E-06  | 3.88548 |
| 1418129_at   | RIKEN cDNA 4833413O15 gene                                                       | Dhcr24                 | 8.39E-05  | 3.89801 |
| 1457025_at   | ---                                                                              | 4833413O15Rik          | 0.0006892 | 3.90029 |
| 1437199_at   | caspace 1 /// hypothetical protein LOC100044207                                  | ---                    | 1.27E-07  | 3.90582 |
| 1449265_at   | NLR family, apoptosis inhibitory protein 1                                       | Casp1 /// LOC100044207 | 4.67E-06  | 3.9069  |
| 1425298_a_at | neuraminidase 3                                                                  | Naip1                  | 0.0001103 | 3.91897 |
| 1419339_at   | aquaporin 3                                                                      | Neu3                   | 3.92E-05  | 3.93583 |
| 1422008_a_at | RIKEN cDNA 2310014L17 gene                                                       | Aqp3                   | 0.0016147 | 3.94084 |
| 1430715_at   | galanin receptor 2                                                               | 2310014L17Rik          | 1.00E-05  | 3.96803 |
| 1422942_at   | expressed sequence AI661453                                                      | Galr2                  | 6.50E-05  | 3.98826 |
| 1425163_at   | Transcribed locus                                                                | AI661453               | 2.06E-05  | 3.99783 |
| 1444740_at   | fibroblast growth factor 1                                                       | ---                    | 0.0002383 | 4.01208 |
| 1441042_at   | Ly6/Plaur domain containing 5                                                    | Fgf1                   | 1.36E-05  | 4.01744 |
| 1453809_at   | echinoderm microtubule associated protein like 5                                 | Lypd5                  | 1.30E-05  | 4.03098 |
| 1427484_at   | angiotensin I converting enzyme (peptidyl-dipeptidase A) 2                       | Emi5                   | 5.63E-07  | 4.03836 |
| 1425103_at   | kallikrein related-peptidase 9                                                   | Ace2                   | 1.98E-05  | 4.06495 |

|              |                                                                                           |                              |           |         |
|--------------|-------------------------------------------------------------------------------------------|------------------------------|-----------|---------|
| 1431681_at   | grainyhead-like 3 (Drosophila)                                                            | Klk9                         | 7.81E-06  | 4.06539 |
| 1436932_at   | RIKEN cDNA 3930401B19 gene /// RIKEN cDNA 1200016E24 gene /// RIKEN cDNA A1300401B19 gene | Grhl3                        | 1.41E-05  | 4.06926 |
| 1453238_s_at | homeo box C5                                                                              | 1200016E24Rik /// 3930401B19 | 9.32E-06  | 4.12253 |
| 1450832_at   | B-box and SPRY domain containing                                                          | Hoxc5                        | 8.54E-05  | 4.12473 |
| 1450131_a_at | spinster homolog 2 (Drosophila)                                                           | Bspry                        | 1.05E-05  | 4.13012 |
| 1451601_a_at | RIKEN cDNA 2310046K01 gene                                                                | Spns2                        | 5.55E-07  | 4.14647 |
| 1429292_a_at | retinol dehydrogenase 20                                                                  | 2310046K01Rik                | 1.86E-05  | 4.15309 |
| 1430785_at   | ---                                                                                       | Rdh20                        | 5.14E-05  | 4.16309 |
| 1439944_at   | RIKEN cDNA 1110067D22 gene                                                                | ---                          | 0.0003989 | 4.16735 |
| 1451313_a_at | deoxyribonuclease 1-like 2 /// similar to Dnase1I2 protein                                | 1110067D22Rik                | 0.0009172 | 4.1723  |
| 1423320_at   | mal, T-cell differentiation protein 2                                                     | Dnase1I2 /// LOC100047816    | 2.10E-05  | 4.18504 |
| 1427042_at   | sphingomyelin phosphodiesterase 3, neutral                                                | Mal2                         | 9.42E-05  | 4.19923 |
| 1450748_at   | keratin 80                                                                                | Smpd3                        | 4.78E-05  | 4.20526 |
| 1419619_at   | calpain 12                                                                                | Krt80                        | 1.13E-06  | 4.21443 |
| 1449970_at   | protocadherin 1                                                                           | Capn12                       | 1.03E-06  | 4.22423 |
| 1452294_at   | RIKEN cDNA 9030409G11 gene                                                                | Pcdh1                        | 4.50E-06  | 4.23178 |
| 1431711_a_at | fibroblast growth factor 22                                                               | 9030409G11Rik                | 3.12E-05  | 4.25389 |
| 1460296_a_at | DNA segment, Chr 9, ERATO Doi 280, expressed                                              | Fgf22                        | 1.16E-05  | 4.25605 |
| 1456481_at   | glycerophosphodiester phosphodiesterase domain containing 1                               | D9Ert280e                    | 8.31E-07  | 4.27873 |
| 1424076_at   | patatin-like phospholipase domain containing 1                                            | Gdpd1                        | 1.29E-05  | 4.28462 |
| 1457448_at   | gasdermin A1                                                                              | Pnpla1                       | 1.56E-05  | 4.29561 |
| 1457777_at   | RIKEN cDNA 2310011E23 gene                                                                | Gsdma1                       | 1.13E-05  | 4.2977  |
| 1435111_at   | NIPA-like domain containing 1                                                             | 2310011E23Rik                | 8.92E-07  | 4.30351 |
| 1453345_at   | BMP and activin membrane-bound inhibitor, homolog (Xenopus laevis)                        | Npal1                        | 1.61E-05  | 4.31506 |
| 1423753_at   | mal, T-cell differentiation protein-like                                                  | Bambi                        | 8.59E-06  | 4.32937 |
| 1425359_at   | methyl-CpG binding domain protein 1                                                       | Mall                         | 1.48E-06  | 4.33372 |
| 1453678_at   | solute carrier family 15, member 3                                                        | Mbd1                         | 0.0001494 | 4.34631 |
| 1420697_at   | lipase, family member M                                                                   | Slc15a3                      | 2.49E-05  | 4.35266 |
| 1430550_at   | caspase recruitment domain family, member 14                                              | Lipm                         | 6.17E-05  | 4.3753  |
| 1450142_a_at | EPS8-like 1                                                                               | Card14                       | 0.0001246 | 4.37716 |
| 1431821_a_at | OTU domain, ubiquitin aldehyde binding 2                                                  | Eps8l1                       | 1.49E-05  | 4.38652 |
| 1417576_a_at | glycine decarboxylase                                                                     | Otub2                        | 1.98E-05  | 4.40933 |
| 1416049_at   | Transcribed locus                                                                         | Gldc                         | 7.13E-05  | 4.41319 |
| 1443437_at   | amphiregulin                                                                              | ---                          | 0.0007725 | 4.42141 |
| 1421134_at   | breast carcinoma amplified sequence 1                                                     | Areg                         | 0.0002222 | 4.43392 |
| 1428792_at   | sema domain, immunoglobulin domain (Ig), short basic domain, secreted, (semaphorin)       | Bcas1                        | 1.66E-07  | 4.44094 |
| 1425906_a_at | dual oxidase maturation factor 1                                                          | LOC100044162 /// Sema3e      | 5.19E-06  | 4.4425  |
| 1460372_at   | keratin 23                                                                                | Duoxa1                       | 8.89E-06  | 4.45888 |
| 1418213_at   | solute carrier family 6 (neurotransmitter transporter), member 19                         | Krt23                        | 4.05E-06  | 4.4667  |
| 1428595_at   | angiotensin I converting enzyme (peptidyl-dipeptidase A) 2                                | Slc6a19                      | 6.64E-07  | 4.46717 |
| 1452138_a_at | aldehyde oxidase 4                                                                        | Ace2                         | 6.23E-06  | 4.51131 |
| 1419215_at   | glutathione S-transferase, theta 3                                                        | Aox4                         | 7.13E-07  | 4.52277 |
| 1423891_at   | kinesin family member 21A                                                                 | Gstt3                        | 2.45E-08  | 4.54139 |
| 1450738_at   | paired-like homeodomain transcription factor 1                                            | Kif21a                       | 1.26E-05  | 4.55412 |
| 1419514_at   | NLR family, pyrin domain containing 10                                                    | Pitx1                        | 3.68E-05  | 4.56027 |

|              |                                                                                  |                            |           |         |
|--------------|----------------------------------------------------------------------------------|----------------------------|-----------|---------|
| 1456211_at   | defensin beta 1                                                                  | Nlrp10                     | 1.14E-06  | 4.56132 |
| 1419492_s_at | glutaredoxin                                                                     | Defb1                      | 1.97E-06  | 4.56439 |
| 1416592_at   | CKLF-like MARVEL transmembrane domain containing 8                               | Glrx                       | 4.86E-06  | 4.60083 |
| 1427964_at   | transmembrane protein 79                                                         | Cmtm8                      | 9.35E-06  | 4.62137 |
| 1430483_a_at | orosomucoid 1                                                                    | Tmem79                     | 2.21E-05  | 4.6268  |
| 1451054_at   | endonuclease domain containing 1                                                 | Orm1                       | 7.07E-05  | 4.66426 |
| 1426542_at   | PHD finger protein 7                                                             | Endod1                     | 7.61E-05  | 4.68654 |
| 1440828_x_at | lysozyme G-like 1                                                                | Phf7                       | 0.0001738 | 4.73215 |
| 1429334_at   | Bcl2-like 15                                                                     | Lyg1                       | 5.75E-05  | 4.73318 |
| 1452614_at   | RIKEN cDNA 2310002J15 gene                                                       | Bcl2l15                    | 4.24E-06  | 4.74501 |
| 1450532_at   | alcohol dehydrogenase 6B (class V)                                               | 2310002J15Rik              | 2.61E-05  | 4.80935 |
| 1441094_at   | retinol dehydrogenase 20                                                         | Adh6b                      | 6.25E-06  | 4.82269 |
| 1456074_at   | ELMO domain containing 1                                                         | Rdh20                      | 2.25E-05  | 4.83784 |
| 1434083_a_at | glycosylphosphatidylinositol specific phospholipase D1                           | Elmod1                     | 1.99E-06  | 4.89079 |
| 1418050_at   | solute carrier family 6 (neurotransmitter transporter), member 19                | Gpld1                      | 5.69E-06  | 4.92889 |
| 1455442_at   | deoxyribonuclease 1-like 2                                                       | Slc6a19                    | 1.46E-07  | 4.94751 |
| 1450936_a_at | sorting nexin 31                                                                 | Dnase1l2                   | 5.56E-05  | 4.99945 |
| 1453177_at   | insulin degrading enzyme                                                         | Snx31                      | 2.56E-07  | 5.01256 |
| 1453988_a_at | gap junction protein, beta 6                                                     | Ide                        | 2.13E-06  | 5.04049 |
| 1448397_at   | RIKEN cDNA 1700047M11 gene                                                       | Gjb6                       | 1.00E-05  | 5.05017 |
| 1438044_at   | RIKEN cDNA 1200003I10 gene /// RIKEN cDNA 1200015M12 gene /// RIKEN cDNA 1200016 | 1700047M11Rik              | 2.65E-05  | 5.06328 |
| 1427932_s_at | interleukin 1 family, member 10                                                  | 1200003I10Rik /// 1200015M | 4.20E-08  | 5.06593 |
| 1451957_at   | galactosidase, beta 1-like 2                                                     | Il1f10                     | 5.55E-08  | 5.08201 |
| 1433728_at   | ring finger protein 39                                                           | Glb1l2                     | 1.77E-06  | 5.08408 |
| 1440912_at   | predicted gene, OTTMUSG00000015762                                               | Rnf39                      | 8.62E-05  | 5.12451 |
| 1456784_at   | endonuclease domain containing 1                                                 | OTTMUSG00000015762         | 3.89E-06  | 5.13628 |
| 1426543_x_at | glutaredoxin                                                                     | Endod1                     | 4.57E-05  | 5.14602 |
| 1416593_at   | ST8 alpha-N-acetyl-neuraminide alpha-2,8-sialyltransferase 6                     | Glrx                       | 6.67E-06  | 5.18432 |
| 1456440_s_at | similar to Chromosome 6 open reading frame 117                                   | St8sia6                    | 2.71E-06  | 5.24089 |
| 1436274_at   | X Kell blood group precursor related X linked                                    | LOC244958                  | 0.0001147 | 5.24121 |
| 1454762_at   | RIKEN cDNA 2310014L17 gene                                                       | Xkrx                       | 4.68E-07  | 5.27607 |
| 1435572_at   | NIPA-like domain containing 1                                                    | 2310014L17Rik              | 1.04E-07  | 5.27751 |
| 1456321_at   | RIKEN cDNA 1200015M12 gene /// RIKEN cDNA 1200016E24 gene /// RIKEN cDNA A13004  | Npal1                      | 1.60E-05  | 5.27805 |
| 1435137_s_at | male sterility domain containing 1                                               | 1200015M12Rik /// 1200016E | 0.0003343 | 5.28386 |
| 1435621_at   | myelin protein zero-like 2                                                       | Mlst1                      | 1.19E-05  | 5.28745 |
| 1416237_at   | solute carrier family 5 (sodium/glucose cotransporter), member 1                 | Mpzl2                      | 3.48E-05  | 5.35384 |
| 1419057_at   | cornifelin                                                                       | Slc5a1                     | 7.94E-06  | 5.35625 |
| 1429540_at   | ---                                                                              | Cnfn                       | 4.39E-06  | 5.40733 |
| 1450470_at   | gasdermin A1                                                                     | ---                        | 2.49E-07  | 5.43791 |
| 1423634_at   | similar to pol protein /// similar to Ubt1 protein /// similar to cyclic nucleot | Gsdma1                     | 2.64E-06  | 5.56092 |
| 1441150_x_at | angiotensin I converting enzyme (peptidyl-dipeptidase A) 2                       | LOC100039339 /// LOC10003  | 3.13E-06  | 5.56119 |
| 1425102_a_at | galactosidase, beta 1-like 2                                                     | Ace2                       | 1.21E-06  | 5.59935 |
| 1433727_at   | dickkopf-like 1                                                                  | Glb1l2                     | 6.56E-07  | 5.60171 |
| 1417787_at   | paired-like homeodomain transcription factor 1                                   | Dkk1                       | 1.20E-07  | 5.61993 |
| 1449488_at   | keratin associated protein 12-1                                                  | Pitx1                      | 2.05E-05  | 5.64196 |

|              |                                                                                  |                          |           |         |
|--------------|----------------------------------------------------------------------------------|--------------------------|-----------|---------|
| 1450536_s_at | RIKEN cDNA C130073F10 gene                                                       | Krtap12-1                | 1.28E-05  | 5.7092  |
| 1443945_at   | Strain C3H/HeN mRNA preferentially expressed in LPS-normoresponsive macrophages  | C130073F10Rik            | 6.42E-05  | 5.75318 |
| 1427740_a_at | ST8 alpha-N-acetyl-neuraminide alpha-2,8-sialyltransferase 6                     | ---                      | 2.75E-06  | 5.78671 |
| 1456147_at   | acid phosphatase 5, tartrate resistant                                           | St8sia6                  | 1.39E-05  | 5.83963 |
| 1431609_a_at | Transcribed locus                                                                | Acp5                     | 2.84E-06  | 5.8603  |
| 1456539_at   | RIKEN cDNA 2610528A11 gene                                                       | ---                      | 4.49E-07  | 5.91683 |
| 1435639_at   | dual specificity phosphatase 14                                                  | 2610528A11Rik            | 5.98E-07  | 5.91716 |
| 1431422_a_at | dual oxidase 1                                                                   | Dusp14                   | 4.77E-06  | 5.92034 |
| 1456877_at   | glycoprotein Ib, beta polypeptide                                                | Duox1                    | 2.17E-09  | 5.98385 |
| 1422977_at   | arachidonate 12-lipoxygenase, 12R type /// similar to arachidonate 12-lipoxygena | Gp1bb                    | 3.58E-06  | 6.00046 |
| 1418266_at   | Transcribed locus, weakly similar to XP_001478190.1 PREDICTED: similar to LOC635 | Alox12b /// LOC100045755 | 1.15E-05  | 6.03314 |
| 1429676_at   | Ring finger protein 39                                                           | ---                      | 4.25E-07  | 6.0345  |
| 1441793_at   | open reading frame 9                                                             | Rnf39                    | 2.86E-06  | 6.09616 |
| 1425122_at   | RIKEN cDNA C030019I05 gene                                                       | ORF9                     | 6.76E-06  | 6.1156  |
| 1436484_at   | ELL associated factor 2                                                          | C030019I05Rik            | 6.35E-05  | 6.12099 |
| 1422120_at   | solute carrier family 5 (sodium/glucose cotransporter), member 1                 | Eaf2                     | 4.75E-06  | 6.12228 |
| 1455431_at   | kinesin family member 21A                                                        | Slc5a1                   | 0.000244  | 6.12344 |
| 1455029_at   | Fc receptor, IgE, high affinity I, alpha polypeptide                             | Kif21a                   | 6.67E-05  | 6.16532 |
| 1421775_at   | RIKEN cDNA 9530066K23 gene                                                       | Fcer1a                   | 7.41E-06  | 6.22421 |
| 1441909_s_at | phytanoyl-CoA hydroxylase interacting protein-like                               | 9530066K23Rik            | 3.92E-05  | 6.30422 |
| 1427023_at   | late cornified envelope 1L                                                       | Phyhipl                  | 4.77E-06  | 6.36484 |
| 1418855_at   | RIKEN cDNA 9930039A11 gene                                                       | Lce1l                    | 0.0006446 | 6.39066 |
| 1437407_at   | ---                                                                              | 9930039A11Rik            | 9.60E-06  | 6.39348 |
| 1454105_at   | ets homologous factor                                                            | ---                      | 2.31E-06  | 6.39811 |
| 1419475_a_at | pleckstrin homology domain containing, family H (with MyTH4 domain) member 1     | Ehf                      | 9.31E-07  | 6.60481 |
| 1447807_s_at | RIKEN cDNA 1200016E24 gene                                                       | Plekhh1                  | 3.64E-06  | 6.60947 |
| 1452418_at   | transmembrane protease, serine 11f                                               | 1200016E24Rik            | 4.91E-07  | 6.61767 |
| 1441981_at   | pleckstrin homology domain containing, family H (with MyTH4 domain) member 1     | Tmprss11f                | 3.51E-06  | 6.62818 |
| 1435053_s_at | endonuclease domain containing 1                                                 | Plekhh1                  | 8.57E-06  | 6.67944 |
| 1426540_at   | myosin, light polypeptide 7, regulatory                                          | Endod1                   | 5.31E-06  | 6.68001 |
| 1449071_at   | NTPase, KAP family P-loop domain containing 1                                    | Myl7                     | 1.01E-06  | 6.73182 |
| 1430087_at   | endonuclease domain containing 1                                                 | Nkpd1                    | 3.60E-06  | 6.91089 |
| 1426541_a_at | kallikrein related-peptidase 10                                                  | Endod1                   | 0.0005666 | 7.01717 |
| 1460236_at   | transglutaminase 1, K polypeptide                                                | Klk10                    | 3.83E-06  | 7.10086 |
| 1451416_a_at | glutathione S-transferase, alpha 4                                               | Tgm1                     | 8.24E-08  | 7.36794 |
| 1416368_at   | keratin 77                                                                       | Gsta4                    | 5.83E-07  | 7.46787 |
| 1433923_at   | retinoic acid receptor, beta                                                     | Krt77                    | 9.13E-07  | 7.49249 |
| 1454906_at   | epiregulin                                                                       | Rarb                     | 3.80E-07  | 7.53244 |
| 1419431_at   | sphingosine-1-phosphate phosphotase 2                                            | Ereg                     | 6.45E-06  | 7.66038 |
| 1457867_at   | transmembrane protease, serine 11a                                               | Sgpp2                    | 1.01E-05  | 7.68995 |
| 1455848_at   | defensin beta 1                                                                  | Tmprss11a                | 1.04E-06  | 7.77527 |
| 1419491_at   | expressed sequence AA986860                                                      | Defb1                    | 3.43E-06  | 7.85397 |
| 1433610_at   | cytochrome P450, family 11, subfamily a, polypeptide 1                           | AA986860                 | 1.99E-05  | 7.87554 |
| 1439947_at   | fibroblast growth factor 1                                                       | Cyp11a1                  | 3.57E-06  | 7.91232 |
| 1450869_at   | isopentenyl-diphosphate delta isomerase 2 /// similar to isopentenyl diphosphate | Fgf1                     | 1.70E-05  | 8.12033 |

|              |                                                                                  |                                 |          |         |
|--------------|----------------------------------------------------------------------------------|---------------------------------|----------|---------|
| 1440852_at   | Transcribed locus                                                                | Idi2 /// LOC100039655           | 1.35E-05 | 8.24223 |
| 1458236_at   | E74-like factor 5                                                                | ---                             | 4.88E-07 | 8.25195 |
| 1419556_at   | hydroxysteroid 11-beta dehydrogenase 1                                           | Elf5                            | 8.73E-06 | 8.26165 |
| 1449038_at   | kallikrein related-peptidase 12                                                  | Hsd11b1                         | 1.95E-07 | 8.32608 |
| 1453495_at   | ATPase, Na+/K+ transporting, beta 1 polypeptide                                  | Klk12                           | 8.62E-07 | 8.46086 |
| 1451152_a_at | ATPase, Na+/K+ transporting, beta 1 polypeptide                                  | Atp1b1                          | 1.02E-06 | 8.56614 |
| 1423890_x_at | ATPase, Na+/K+ transporting, beta 1 polypeptide                                  | Atp1b1                          | 3.69E-07 | 8.58536 |
| 1418453_a_at | ets homologous factor                                                            | Atp1b1                          | 4.51E-07 | 8.75651 |
| 1451375_at   | RIKEN cDNA 4732473B16 gene                                                       | Ehf                             | 1.33E-05 | 8.96811 |
| 1433877_at   | serine (or cysteine) peptidase inhibitor, clade B (ovalbumin), member 11         | 4732473B16Rik                   | 3.19E-08 | 9.11511 |
| 1449451_at   | arginase 1, liver                                                                | Serp1b1                         | 2.03E-06 | 9.15704 |
| 1419549_at   | chitinase 3-like 1                                                               | Arg1                            | 2.85E-05 | 9.19929 |
| 1451537_at   | phospholipase A2, group IVB (cytosolic) /// hypothetical protein LOC433466       | Chi31                           | 3.18E-05 | 9.46444 |
| 1456047_at   | ets homologous factor                                                            | LOC433466 /// Pla2g4b           | 6.81E-06 | 9.49252 |
| 1419474_a_at | keratin 13                                                                       | Ehf                             | 6.40E-06 | 9.50543 |
| 1422454_at   | guanine nucleotide binding protein (G protein), gamma 4                          | Krt13                           | 2.53E-05 | 9.63169 |
| 1447669_s_at | stimulated by retinoic acid gene 6                                               | Gng4                            | 2.08E-08 | 9.74468 |
| 1422723_at   | glutathione S-transferase, alpha 3                                               | Stra6                           | 4.27E-06 | 9.80349 |
| 1423436_at   | interleukin 1 family, member 9                                                   | Gsta3                           | 7.10E-07 | 9.85618 |
| 1425958_at   | RIKEN cDNA 2310042E22 gene                                                       | Il1f9                           | 1.27E-05 | 10.74   |
| 1423494_at   | phospholipase A2, group IVE                                                      | 2310042E22Rik                   | 2.42E-07 | 11.269  |
| 1429862_at   | Lipase, family member K                                                          | Pla2g4e                         | 8.64E-07 | 11.4007 |
| 1443914_at   | Transcribed locus                                                                | Lipk                            | 5.35E-06 | 11.4908 |
| 1458519_at   | protease, serine 27 /// similar to protease, serine 27                           | ---                             | 1.90E-06 | 11.5317 |
| 1440686_at   | male sterility domain containing 1                                               | LOC100048538 /// Prss27         | 4.80E-07 | 11.9398 |
| 1455889_at   | distal-less homeobox 5                                                           | Mlstd1                          | 2.96E-08 | 12.4751 |
| 1449863_a_at | V-set and immunoglobulin domain containing 8                                     | Dlx5                            | 2.95E-07 | 12.4962 |
| 1436671_at   | interleukin 1 family, member 6                                                   | Vsig8                           | 2.69E-06 | 12.5421 |
| 1418609_at   | alcohol dehydrogenase 6A (class V)                                               | Il1f6                           | 1.64E-07 | 12.57   |
| 1429608_at   | cellular retinoic acid binding protein II                                        | Adh6a                           | 2.99E-06 | 13.0265 |
| 1451191_at   | ATPase, Na+/K+ transporting, beta 1 polypeptide                                  | Crabp2                          | 2.52E-06 | 13.5895 |
| 1439036_a_at | guanine nucleotide binding protein (G protein), gamma 4                          | Atp1b1                          | 1.05E-05 | 13.6138 |
| 1417943_at   | RIKEN cDNA 2310007B03 gene                                                       | Gng4                            | 3.40E-06 | 14.6408 |
| 1453511_at   | glutathione peroxidase 3                                                         | 2310007B03Rik                   | 2.01E-06 | 14.669  |
| 1449106_at   | serine (or cysteine) peptidase inhibitor, clade A, member 1a /// serine (or cyst | Gpx3                            | 4.33E-07 | 17.1458 |
| 1451513_x_at | late cornified envelope 3B                                                       | Serpina1a /// Serpina1b         | 5.16E-07 | 18.4358 |
| 1429641_x_at | serine (or cysteine) peptidase inhibitor, clade A, member 1b                     | Lce3b                           | 3.53E-06 | 18.5565 |
| 1418282_x_at | small proline-rich protein 1B                                                    | Serpina1b                       | 1.25E-05 | 20.5616 |
| 1422672_at   | psoriasis susceptibility 1 candidate 2 (human)                                   | Spr1b                           | 1.94E-06 | 24.9727 |
| 1420467_at   | bone gamma-carboxyglutamate protein, related sequence 1 /// bone gamma carboxygl | Psors1c2                        | 2.61E-07 | 25.1416 |
| 1449880_s_at | E74-like factor 5                                                                | Bglap-rs1 /// Bglap1 /// Bglap2 | 6.22E-07 | 36.9459 |
| 1419555_at   | fetuin beta                                                                      | Elf5                            | 3.49E-07 | 55.8813 |
| 1449555_a_at | RIKEN cDNA 2300002M23 gene                                                       | Fetub                           | 5.71E-07 | 55.8901 |
| 1429496_x_at | late cornified envelope 3C                                                       | 2300002M23Rik                   | 5.73E-08 | 87.4688 |
| 1419317_x_at | late cornified envelope 3A                                                       | Lce3c                           | 2.87E-07 | 95.7855 |



|            |                                                               |                     |          |         |
|------------|---------------------------------------------------------------|---------------------|----------|---------|
| 1456001_at | RIKEN cDNA 2310057N15 gene                                    | Lce3a               | 2.21E-07 | 122.372 |
| 1421575_at | late cornified envelope 3F /// hypothetical protein LOC630971 | 2310057N15Rik       | 3.20E-08 | 126.301 |
| 1456248_at | RIKEN cDNA 2310034C09 gene                                    | Lce3f /// LOC630971 | 4.86E-07 | 260.834 |
| 1449986_at | keratin associated protein 13                                 | 2310034C09Rik       | 2.17E-07 | 344.975 |
| 1420358_at |                                                               | Krtap13             | 3.25E-07 | 406.529 |
