# Supplementary material
Source: PubMed Central journal article supplement (PMC3346831)
Supplement: supp_125.7.1827_JCS101550TableS2.pdf [file supp_125.7.1827_JCS101550TableS2.pdf]

**Supplementary Table S2. Antibodies used in this study**

|           | Antibody       | Spices                       | Source              | Dilution (IHC/IF) | Dilution (WB) |
|-----------|----------------|------------------------------|---------------------|-------------------|---------------|
| Primary   |                |                              |                     |                   |               |
|           | Keratin 10     | Rabbit                       | Covance             | 1:500             |               |
|           | Keratin 5      | Guinea Pig                   | Lifespan            | 1:200             |               |
|           | Pan-keratin    | Mouse                        | Abcam               | 1:10              |               |
|           | Keratin 6      | Rabbit                       | Covance             | 1:500             |               |
|           | Keratin 19     | Rabbit                       | Novus Biologicals   | 1:100             |               |
|           | Loricrin       | Rabbit                       | Covance             | 1:500             | 1:1,000       |
|           | Involucrin     | Rabbit                       | Covance             | 1:1,000           |               |
|           | Filaggrin      | Rabbit                       | Covance             | 1:2,000           | 1:4,000       |
|           | Actin          | Mouse                        | Sigma               |                   | 1:10,000      |
|           | Ki67           | Rabbit                       | GeneTex             | 1:25              |               |
| Secondary |                |                              |                     |                   |               |
|           | Alexa 488      | Rabbit                       | Molecular Probes    | 1:250             |               |
|           | Alexa 555      | Rabbit/ Mouse/<br>Guinea Pig | Molecular Probes    | 1:250             |               |
|           | Biotylated-IgG | Rabbit                       | Vector Laboratories | 1:500             |               |
|           | HRP-conjugated | Rabbit                       | BioRad              | 1:25,000          |               |
|           | HRP-conjugated | Mouse                        | Serotec             | 1:25,000          |               |

IHC: Immunohistochemistry, IF: Immunofluorescence, WB: Western Blot
