# Supplementary material
Source: PubMed Central journal article supplement (PMC3346831)
Supplement: supp_125.7.1827_JCS101550TableS3.pdf [file supp_125.7.1827_JCS101550TableS3.pdf]

**Supplementary Table S3.****The primer sequences used in this study**

|                   | Forward primer (5'-3') | Reverse primer (3'-5') |
|-------------------|------------------------|------------------------|
| Cyp26b1           | CAAGATCCTACTGGGCGAAC   | GGGCAGGTAGCTCTCAAGTG   |
| Keratin 1         | CAACGCAGAGAATGAGTTCG   | TTCCATTTGGTAGAGTGCAGAG |
| Vimentin          | GGAAAGTGGAATCCTTG CAG  | GTGAGGTCAGGCTTGGAAC    |
| RAR $\beta$       | TGCCTTTGGAAATGGATGAC   | AGTGCTTCCAGCAGTGTT C   |
| 2310034<br>C09Rik | CCAGAAGCCCTGCTACTATCC  | CAAGGAAGGGAAGCCATAGAC  |
| 2310057<br>N15Rik | CTGCCAGAAGCCCTGCTACTAC | CAGGGAAGGGAAGCCATAGAC  |
| Krtap13           | CGGAGTCTTTAGCTTTCCTACC | GCATTCAGTATTGGCACTGG   |
| Filaggrin         | CCATTTGGGTGATAGTTCCTTC | GGGAACACATGGAGAAGTCAG  |
| RPLP0             | ATCAATGGGTACAAGCGCGTC  | CAGATGGATCAGCCAGGAAGG  |
